1 *Cell cycle progression defects and impaired DNA damage signaling drive enlarged cells into*  
2 *senescence*

3  
4 Sandhya Manohar <sup>a</sup>, Marianna E. Estrada <sup>a</sup>, Federico Uliana <sup>a</sup>, and Gabriel E. Neurohr <sup>a,b</sup>

5 <sup>a</sup> Institute for Biochemistry, Department of Biology, ETH Zürich, 8093 Zürich Switzerland

6 <sup>b</sup> Corresponding author

7 **Abstract**

8 Cellular senescence plays an important role in development, ageing, and cancer  
9 biology. Senescence is associated with increased cell size, but how this contributes to  
10 permanent cell cycle exit is poorly understood. Using reversible G1 cell cycle arrests combined  
11 with growth rate modulation, we examined the effects of excess cell size on cell cycle  
12 progression in human cells. We show that enlarged cells paradoxically have high levels of  
13 G1/S regulators relative to cells that were maintained at physiological size but also induce  
14 p21, which restrains cell cycle entry and protects against cell division failure. Furthermore, we  
15 find that enlarged cells bear an increased propensity for DNA breakage and concomitant DNA  
16 damage repair defects that are established during G1. Based on these observations, we  
17 propose that impaired DNA damage repair pathways prime enlarged cells for persistent  
18 replication-acquired damage, ultimately leading to catastrophic cell cycle failure and  
19 permanent cell cycle exit.

20  
21 **Introduction**

22 Cellular senescence describes a permanent state of cell cycle arrest induced by exog-  
23 enous or endogenous stressors [1, 2]. These include but are not limited to telomere attrition,  
24 genotoxic and proteotoxic stress, and oncogene activation. In addition, many cancer therapies  
25 (e.g., chemotherapies and radiotherapies) trigger senescence and thus permanent cell cycle  
26 withdrawal in tumor cells [3]. Still, though senescence suppresses proliferation, tumors con-  
27 taining persistent senescent cells can be more invasive and are associated with worse out-  
28 comes [3, 4]. Thus, identifying how short-term cellular insults can cause a durable loss of  
29 proliferative potential is essential for understanding the benefits and limitations of senescence  
30 induction as an antitumor therapeutic strategy.

31 Despite being caused by diverse stimuli, it has long been observed that senescent  
32 cells are larger than cycling cells [5]. This observation is important because—although healthy  
33 mammalian cells exist at a wide range of sizes—the cell size distribution for a given cell type  
34 is typically narrow [6]. Deviations from this range are associated with a loss of fitness, cell  
35 cycle failure, and permanent cell cycle arrest [7, 8]. More recent work has demonstrated that  
36 increased cell size is sufficient to withdraw cells from the cell cycle [7-12]. Still, it is unclear  
37 what pathways drive cell cycle exit in excessively large cells and how increased size activates

38 these pathways. Answering these questions will provide key insight into how permanent cell  
39 cycle arrest is conferred in senescent cells.

40 In mammalian cells, senescence induction typically requires one of two signaling axes:  
41 the Rb pathway or the p53/p21 pathway [13]. Rb is a cell cycle inhibitor that binds E2F-family  
42 transcription factors to inhibit the transcription of G<sub>1</sub>/S cyclins and components of the DNA  
43 replication apparatus [14], thereby blocking cell cycle entry. In the classical model, Rb is par-  
44 tially inactivated by Cdk4/6-mediated phosphorylation during late G<sub>1</sub>. This facilitates low levels  
45 of E2F-mediated transcription, a target of which is cyclin E. Cyclin E production activates Cdk2  
46 (the G<sub>1</sub>/S cyclin-dependent kinase) which further phosphorylates Rb to release E2F transcrip-  
47 tional inhibition completely [15]. Rb expression levels also play a role in dictating its activity:  
48 high levels of Rb are sufficient to cause G<sub>1</sub> cell cycle arrest [16] and loss of Rb drives cell cycle  
49 progression forward [17, 18]. Furthermore, others have shown that reducing Rb concentra-  
50 tions during growth is a mechanism for linking cell growth to cell cycle entry [19, 20]. Thus, Rb  
51 abundance and its phosphorylation state are both important for regulating the G<sub>1</sub>/S transition.

52 The p53/p21 pathway is another major cell cycle arrest pathway in mammalian cells.  
53 p53 is a transcription factor that is activated upon DNA damage [21], aneuploidy [22-24], oxi-  
54 dative damage [25], and other stressors. Following DNA damage, p53 stabilization is mediated  
55 by ATM and ATR protein kinases [21, 26, 27]. In this context, many of p53's transcriptional  
56 targets are implicated in DNA damage repair and cell cycle arrest [28]. p21—one of p53's  
57 main transcriptional targets—is a Cdk1/2/4/6 inhibitor that halts cell cycle progression through  
58 the G<sub>1</sub>/S boundary [29]. Depending on context, p21 expression can contribute to temporary  
59 cell cycle arrest, permanent cell cycle arrest (senescence), apoptosis, or DNA repair [29]. Still,  
60 p21 dynamics are complex, and p21 expression can have opposing effects under different  
61 circumstances. Indeed, high levels of p21 cause cell cycle arrest, whereas intermediate levels  
62 can drive cell cycle progression forward [30, 31]. In addition to directly binding Cdks, p21 can  
63 interact with components of the DNA replication apparatus to halt DNA synthesis and modu-  
64 late repair pathways [32]. p21 transcription can also be stimulated independent of p53, includ-  
65 ing through the HRAS-Raf-MAPK pathway and by various transcription factors (e.g., SP1,  
66 AP2, C/EBP $\alpha/\beta$ ) [29].

67 There is considerable crosstalk between the p53/p21 and Rb pathways. Because Rb  
68 mediated inhibition of E2F is dictated by Cdks, high levels of p21 block Cdk activity and there-  
69 fore prevent E2F activation. Moreover, Rb directly regulates p53 stability through its interaction  
70 with MDM2, a p53-directed ubiquitin ligase [33]. Still, it is yet unclear if increased cell size  
71 activates either or both pathways to drive permanent cell cycle exit.

72 Here, we show that continued cell growth is required to induce long-term cell cycle exit  
73 in human cells treated with the Cdk4/6 inhibitor palbociclib. We find that enlarged cells upreg-  
74 ulate p21, which protects against cell cycle entry and subsequent cell cycle failure. Indeed,

75 large cells that enter the cell cycle have S/G<sub>2</sub>/M delays and undergo mitotic catastrophes with  
76 high frequency. These cell cycle abnormalities are accompanied by a blunted p53 response  
77 and DNA damage repair defects in enlarged cells, resulting in a high propensity for DNA dam-  
78 age during G<sub>1</sub>. We propose that these defects prime cells for high levels of replication-acquired  
79 damage during S-phase, leading to catastrophic mitoses followed by permanent cell cycle  
80 withdrawal. Together, these results provide a framework for defining the fate of enlarged G<sub>1</sub>  
81 cells and show that excess cell size renders cells prone to DNA damage by interfering with  
82 DNA damage signaling and repair.

83

## 84 **Results**

### 85 *Continued cell growth induces permanent cell cycle exit following a prolonged G<sub>1</sub> arrest*

86 In order to understand how increased cell size influences cell cycle progression, we  
87 used the Cdk4/6 inhibitor palbociclib to arrest hTERT-RPE1 (hereafter referred to as RPE1)  
88 cells in G<sub>1</sub> (**Figure S1A-S1B**). Because G<sub>1</sub>-arrested cells continue to accumulate biomass [7],  
89 this treatment enables continued growth in the absence of division and significantly increases  
90 cell size. To disentangle the effects of increased size from those caused by prolonged Cdk4/6  
91 inhibition, we employed two control strategies: (1) seeding cells at high confluence (contact  
92 inhibition) prior to palbociclib treatment and (2) inhibiting mTOR activity during G<sub>1</sub> arrest using  
93 the small molecule Torin1 (**Figure 1A**). Using these approaches, we were able to obtain en-  
94 larged G<sub>1</sub>-arrested cells and corresponding control cells that were close in size to untreated  
95 cells despite experiencing G<sub>1</sub> cell cycle arrest for the same duration (**Figure 1B, Figure S1C**).  
96 Control cells for which growth was restricted during a 6-day palbociclib-mediated arrest using  
97 either of these strategies are hereafter called “size-constrained.” Importantly, though cells that  
98 were co-treated with Torin1 to constrain cell size could simply be switched to drug-free media  
99 to examine cell cycle re-entry, cells that were contact inhibited had to be re-seeded at a lower  
100 density to facilitate cell cycle re-entry (**Figure 1A**). In both cases, size-constrained cells were  
101 plated in palbociclib alone for one day following arrest to allow them to recover from the effects  
102 of Torin1 treatment or contact inhibition respectively. Maintenance of G<sub>1</sub> arrest was confirmed  
103 using FUCCI cell cycle reporters, which show that mAG-geminin<sup>1-110</sup> (an S/G<sub>2</sub>/M marker) levels  
104 are low in 6-day arrested cells relative to cycling cells and are consistent between enlarged  
105 and size-constrained cells (**Figure S1A-S1B**).

106 Previous work has shown that cells that have grown beyond their physiological size  
107 range fail to proliferate and enter senescence [7, 8, 34]. In agreement with these observations,  
108 we found that constraining cell size using contact inhibition or Torin1 treatment is sufficient to  
109 rescue long-term proliferation following G<sub>1</sub> arrest release in RPE1 cells (**Figure 1C-1D**). To  
110 understand at what point following G<sub>1</sub> arrest release large RPE1 cells undergo cell cycle fail-  
111 ure, we monitored cell cycle markers by western blot following release in large cells and cells

112 whose size had been constrained using Torin1 and contact inhibition (**Figure 1E**). We found  
113 that size-constrained cells recover and maintain cyclin A2 expression (which is observed in  
114 S/G<sub>2</sub>/early-M cells [35]) following release from G<sub>1</sub> arrest, indicating that they continue to cycle.  
115 In contrast, cells that grew large recover cyclin A2 expression only transiently. These data  
116 suggest that enlarged RPE1 cells enter the cell cycle once following G<sub>1</sub> release before perma-  
117 nently exiting the cell cycle.

118 To further understand the events that lead to cell cycle failure in RPE1 cells, we used  
119 live-cell imaging to investigate cell cycle re-entry dynamics. Using the experimental scheme  
120 shown in **Figure 1A**, we monitored cell cycle progression in large and size-constrained RPE1  
121 cells expressing FUCCI cell cycle reporters [36] following G<sub>1</sub> arrest release. Though nearly all  
122 size-constrained cells began accumulating mAG1-geminin<sup>1-110</sup> within 18 hours of release, 40%  
123 of enlarged cells remain arrested in G<sub>1</sub> (**Figure 1F**). In large cells that entered mitosis, mitotic  
124 entry was delayed relative to cells that were kept small (**Figure 1G**). Large cells also spent  
125 significantly longer in mitosis and had a high frequency of abnormal mitotic outcomes, includ-  
126 ing nuclear fragmentation and mitotic slippage yielding binucleated cells (**Figure 1H**, **Figure**  
127 **S1D**). We observed similar post-mitotic defects in fixed RPE1 WT cells, as measured by nu-  
128 clear staining following release (**Figure S1E**). Thus, enlarged cells experience cell cycle de-  
129 lays and have a propensity for prolonged, erroneous mitoses. The latter two observations are  
130 consistent with unresolved DNA replication defects prior to mitotic entry [37]. Indeed, work  
131 from others has demonstrated that G<sub>2</sub>/M cells that were released from a palbociclib-mediated  
132 arrest enter mitosis with replication-acquired DNA damage [11]. Because we observe these  
133 defects only in large cells and not in size-constrained cells, we conclude that the cell cycle  
134 failures observed following palbociclib treatment are a consequence of increased cell size and  
135 not prolonged G<sub>1</sub> cell cycle arrest.

136

### 137 *DNA replication machinery is not limiting in enlarged G<sub>1</sub> cells*

138 Because changes in cell size can profoundly remodel the proteome [12] and cause  
139 cytoplasmic dilution [7], we hypothesized that changes in the abundance of factors that control  
140 faithful cell cycle progression in large cells could be responsible for the cell cycle defects we  
141 observed in enlarged RPE1 cells. In order to address this possibility, we used TMT-based  
142 quantitative proteomics to measure relative protein abundances in 6-day palbociclib arrested  
143 large cells compared to size-constrained cells (**Figure 1A**). To uncover proteins that change  
144 in response to G<sub>1</sub> arrest duration as opposed to size, we also included a 2-day palbociclib-  
145 arrest time point in this experiment (**Figure 2A**). Based on this experimental scheme, we  
146 identified and quantified 5884 proteins based on at least two peptides (**Figure S2A-S2E**, **Ta-**  
147 **ble S1**). Hierarchical clustering analysis showed that Day 2 and Day 6 palbociclib-arrested  
148 samples clustered together, whereas Torin1 and contact inhibited samples clustered together

149 **(Figure S2F)**. Thus, the samples that exceeded physiological size clustered together, and  
150 cells that were maintained close to physiological size clustered together. Together, these ob-  
151 servations suggest that this experimental setup was a viable strategy for stratifying size-re-  
152 lated proteome changes from cell cycle arrest-related changes in G<sub>1</sub> cells.

153 In order to identify proteins whose abundances are differentially regulated in large cells  
154 relative to both of the size-constrained conditions we used, we compared protein abundances  
155 in large cells to each size-constrained condition **(Figure 2B, left)**. Comparison of both fold  
156 changes revealed a linear correlation (adj.  $R^2 = 0.4311$ ). We filtered our dataset for proteins  
157 that change significantly (adj.  $p$ -value < 0.05) with the same directionality relative to both size-  
158 constrained conditions. Using this strategy, we identified 44 proteins whose abundances de-  
159 creased by more than 50% in enlarged cells relative to size-constrained cells **(Table S2)**. This  
160 subset of proteins was comprised mostly of histones **(Figure 2B)**, which was expected and  
161 served as an internal control given that histone abundance scales with DNA content rather  
162 than cell size [12, 38]. In a second step, we filtered our dataset for proteins that increased  
163 significantly more than 2-fold in enlarged cells relative to size-constrained cells. This analysis  
164 revealed 50 proteins **(Figure 2B, inset, Table S3)**. Gene ontology (GO) analysis for biological  
165 processes revealed a strong enrichment in proteins in this subset that are involved in DNA  
166 replication and cell cycle progression **(Figure 2C)**. Transcription factor regulator relationship  
167 analysis revealed that many of these upregulated proteins are known E2F transcriptional tar-  
168 gets **(Figure 2B, inset, Figure 2D)**. In addition, many upregulated proteins are positive regu-  
169 lators of the G<sub>1</sub>/S transition (e.g., CDK1/2, CDK4, CCND1, CKS2) **(Figure S2G)**. Together,  
170 these results suggest that enlarged G<sub>1</sub> arrested RPE1 cells are not deficient in G<sub>1</sub>/S gene  
171 expression relative to size-constrained cells. Of note, our imaging data **(Figure S1A-S1B)**  
172 show that this is not due to enlarged cells escaping the palbociclib-mediated G<sub>1</sub> arrest.

173 Recently published proteomic data indicate that components of the DNA replication  
174 apparatus are depleted over time during palbociclib-mediated G<sub>1</sub> arrest, which could impair  
175 origin licensing and cause replication stress and subsequent cell cycle failure upon release  
176 [11]. Comparison of our Day 2 and Day 6 palbociclib-arrested cells reproduce this finding,  
177 demonstrating a loss in MCM complex components and ORC components as a function of G<sub>1</sub>  
178 arrest duration **(Figure 2E)**. Still, we found that components of the MCM complex are *more*  
179 abundant in large cells compared to size-constrained cells, though this difference is reduced  
180 8 hours after release from arrest **(Figure 2E-2F)**. To address the possibility that enlarged cells  
181 are deficient in replisome loading, we measured MCM2 association with chromatin as others  
182 have done previously [39]. Mirroring total MCM levels, we found that arrested large cells have  
183 more chromatin-associated MCM2 than size-constrained cells, and this difference is elimi-  
184 nated after an 8-hour release **(Figure 2F, bottom)**. Together, these data suggest that repli-  
185 some abundance and loading are not limiting for DNA replication in enlarged cells. This finding

186 is consistent with the observation that MCM components are expressed in vast excess of what  
187 is required for faithful DNA replication [40].

188

### 189 *Excess G<sub>1</sub> cell size activates p53-dependent signaling in RPE1 cells*

190 Despite high levels of positive G<sub>1</sub>/S regulators in enlarged G<sub>1</sub> cells, our proteomic data  
191 revealed that levels of the G<sub>1</sub>/S Cdk inhibitor p21 (*CDKN1A*) are elevated in enlarged RPE1  
192 cells, and we confirmed this by western blot (**Figure 3A, Figure S3A**). In contrast, we found  
193 that levels of p16 (*CDKN2A*; another Cdk inhibitor protein) are reduced in enlarged RPE1 cells  
194 relative to size-constrained cells (**Figure S3B-S3C**). Because p16 negatively regulates a sim-  
195 ilar set of genes as Rb [41], its depletion could also contribute to the elevated levels of G<sub>1</sub>/S  
196 regulators we observed in enlarged cells.

197 Increased p21 expression is a frequent consequence of active p53 signaling [42, 43].  
198 Though we were not able to detect p53 in size-constrained or enlarged RPE1 cells by western  
199 blot or by mass spectrometry, we and others [44] found that depletion of p53 completely ab-  
200 rogates p21 levels in large cells (**Figure 3B-3C**). Of note, we found that p21 expression in  
201 enlarged RPE1 cells does not require active ATM or ATR signaling (**Figure S3D-S3G**) demon-  
202 strating that p53 activation in enlarged G<sub>1</sub> cells is not initially triggered by the canonical DNA  
203 damage response pathway [45].

204 Because p21 is an inhibitor of the G<sub>1</sub>/S transition [29, 46], we examined whether p53  
205 depletion affects cell cycle entry in oversized cells. Indeed, p53 depletion eliminates the frac-  
206 tion of enlarged cells that fail to enter the cell cycle, hastens the G<sub>1</sub>/S transition (**Figure 1F,**  
207 **Figure 3D**), and eliminates the cell cycle delays we observed in enlarged cells that reach  
208 mitosis (**Figure 1G, Figure 3E**). In agreement with the notion that p21 is the critical p53 target  
209 that mediates persistent G<sub>1</sub> arrest in enlarged cells, others have shown that p21 depletion  
210 promotes cell cycle entry in enlarged cells [44]. Moreover, we found that depleting p53 in large  
211 cells increases the frequency of mitotic failure relative to control-transfected large cells but has  
212 no effect on cell cycle progression in size-constrained cells (**Figure 3F-3G, Figure S3H**). This  
213 result indicates that p53 protects against catastrophic cell division failure in enlarged cells but  
214 is dispensable for at least one cell cycle in size-constrained cells. Together, these data indicate  
215 that enlarged cells are primed to progress through the cell cycle but are restrained by active  
216 p53 signaling.

217 Following one round of cell division, large cells almost all arrest in G<sub>1</sub>, likely reflecting  
218 irreparable damage accrued during the previous cell cycle. In contrast, siP53-transfected large  
219 cells continue to cycle. This occurs even in cells that have undergone mitotic catastrophes like  
220 nuclear fragmentation or mitotic slippage (**Figure 3H-3I**). Thus, in summary, p53 limits cell  
221 cycle entry and mitotic failure in enlarged RPE1 cells, but it is not sufficient to block cell cycle  
222 progression in all cells. p53 signaling also prevents subsequent cell cycle re-entry following

223 an initial cell cycle failure, thereby limiting the propagation of unstable genomes. This is con-  
224 sistent with data from others showing that removal of p53 promotes long-term proliferation  
225 following Cdk4/6 inhibitor withdrawal [11, 47, 48].

226

### 227 *Cell cycle entry in enlarged MCF7 cells is blocked by p21*

228 To understand whether the phenotypes we observed in enlarged RPE1s are shared in  
229 other cell types, we analyzed cell size and cell cycle entry dynamics in NALM6 and MCF7  
230 cells following release from prolonged palbociclib-mediated G<sub>1</sub> arrests. Both of these cell lines  
231 are Rb<sup>+</sup> positive and susceptible to palbociclib-mediated G<sub>1</sub> cell cycle arrests [49]. NALM6  
232 cells fail to accumulate significant biomass during a palbociclib-mediated arrest: over 6 days,  
233 they increase in volume less than two-fold (**Figure S4A-S4B**), which is modest compared to  
234 what we observed in RPE1 cells. The relatively unaffected cell volume in NALM6 cells corre-  
235 lated with normal proliferation upon release (**Figure S4C-S4D**), consistent with the notion that  
236 proliferation defects upon release are due to increased cell size. Importantly, these data sug-  
237 gest that cells that limit biomass accumulation during a prolonged G<sub>1</sub> arrest are resistant to  
238 senescence induced by Cdk4/6 inhibition.

239 In contrast to NALM6 cells, MCF7 cells significantly increase in cell size upon pro-  
240 longed palbociclib treatment. Using the scheme shown in **Figure 1A**, we generated size-con-  
241 strained MCF7 cells by co-treating cells with Torin1 (**Figure 4A**). Importantly, plating MCF7  
242 cells at high confluence does not contact inhibit growth [50] and therefore cannot be used as  
243 a strategy for constraining size in these cells. Consistent with our results from RPE1 cells, we  
244 found that enlarged MCF7 cells proliferated less well in long-term growth assays relative to  
245 size-constrained cells (**Figure 4B-4C**). Still, unlike RPE1 cells, MCF7 cells that have grown  
246 large recover very little cyclin A2 expression following G<sub>1</sub> release, suggesting that a majority  
247 of cells fail to re-enter the cell cycle (**Figure 4D**). EdU incorporation measurements confirmed  
248 that nearly three times as many size-constrained cells entered S-phase relative to enlarged  
249 cells following release (**Figure 4E, Figure S4E-S4F**)—a behavior that we previously observed  
250 in IMR90 fibroblasts [7]. Taken together, our findings in both RPE1 and MCF7 cells confirm  
251 that excessive G<sub>1</sub> cell size causes long-term cell cycle failure.

252 Like enlarged RPE1 cells, enlarged MCF7 cells have elevated p21 levels. Still, unlike  
253 in RPE1 cells, this is not affected by siRNA-mediated p53 depletion (**Figure 4F**). Consistent  
254 with this result, p21 knockdown rescued S-phase entry in enlarged MCF7 cells (**Figure 4E,**  
255 **Figure S4E**) whereas p53 knockdown had no effect on cell cycle progression (**Figure 4F,**  
256 **Figure S4F**). Thus, p21 is required for cell cycle arrest in enlarged MCF7 cells. p21 knock-  
257 down also significantly increased the frequency of micronuclei and binucleated cells (**Figure**  
258 **4G, Figure S4G**) in enlarged MCF7 cells two days after G<sub>1</sub> arrest release. Because these  
259 phenotypes arise from failed mitoses, these data and our findings in RPE1 cells demonstrate

260 that cell cycle progression in enlarged cells causes genome instability, and p21 is essential  
261 for limiting these defects.

262

### 263 *Excess cell size dampens DNA damage-induced p53 signaling*

264 Because p53-dependent DNA damage signaling is important for suppressing mitotic  
265 defects associated with failed DNA replication [51-53], we hypothesized that deficits in p53  
266 signaling could potentially explain the high rate of mitotic failure we observed in enlarged cells  
267 that progress through S-phase (**Figure 1H**, **Figure 3D-E**, **Figure 4G**). To investigate p53 dy-  
268 namics in enlarged G<sub>1</sub> cells, we measured how they respond to exogenous sources of DNA  
269 damage. We found that enlarged G<sub>1</sub> RPE1 cells accumulated less p53 over time relative to  
270 size-constrained cells upon doxorubicin treatment (**Figure 5A-5D**). A similar result was ob-  
271 served in MCF7 cells treated with doxorubicin (**Figure S5A**). Moreover, whereas size-con-  
272 strained RPE1 cells display a time-dependent increase in p21 expression that correlates with  
273 p53 stabilization, p21 induction is blunted in enlarged cells (**Figure 5A**, **Figure 5C**). Im-  
274 portantly, size-constrained and enlarged RPE1 cells stabilize p53 to the same extent in the  
275 presence of nutlin-3a—an MDM2 inhibitor that stabilizes p53 by blocking its degradation [54]—  
276 suggesting that the inability of large cells to mount an adequate p53 response does not arise  
277 from defects in p53 synthesis or in p21 induction but may instead be DNA damage-specific  
278 (**Figure 5E**). Consistent with this, others have shown that *TP53* mRNA levels do not fluctuate  
279 in response to changes in cell size [12]. In summary, p53 stabilization and p21 induction as a  
280 consequence of DNA damage are compromised in enlarged G<sub>1</sub> cells.

281

### 282 *Enlarged G<sub>1</sub> cells are prone to DNA damage*

283 Because p53 plays an important role in driving cell cycle arrest and damage repair in  
284 response to DNA damage [13, 21, 28, 45], we asked whether excess cell size causes in-  
285 creased sensitivity to DNA damaging agents, which was recently reported in palbociclib-  
286 treated cells [11]. We found that the proliferation of enlarged cells released from G<sub>1</sub> into a low  
287 dose of doxorubicin (**Figure 6A-6B**) or camptothecin (**Figure 6C-6D**) is stunted compared to  
288 size-constrained cells, indicating that DNA damage sensitivity following prolonged G<sub>1</sub> arrest is  
289 a consequence of increased cell size and not the arrest itself.  $\gamma$ H2AX staining demonstrated  
290 that enlarged G<sub>1</sub> cells harbor higher levels of damage than size-constrained G<sub>1</sub> cells following  
291 doxorubicin treatment (**Figure 6E-6F**, **Figure S6A-S6B**). This result was reproduced in en-  
292 larged MCF7 cells by western blotting (**Figure S6C**). Because H2AX is a histone and therefore  
293 subscales relative to cell size [12, 38] (**Figure 2B**), we normalized loading to histone content  
294 rather than total protein for this experiment. These results show that enlarged cells accumulate  
295 more damage in response to genotoxic stress compared to size-constrained cells. Because  
296 these experiments were carried out during a sustained G<sub>1</sub> arrest, these data demonstrate that



297 increased DNA damage sensitivity in enlarged cells is already established during G<sub>1</sub>. This  
298 likely contributes to the replication stress previously observed in palbociclib-treated cells [11].

299 Analysis of  $\gamma$ H2AX foci in untreated cells revealed that enlarged G<sub>1</sub>-arrested cells have  
300 slightly elevated levels of basal DNA damage relative to size-constrained cells. Because p53  
301 contributes to DNA damage repair, we asked whether the p53 defects we observed in en-  
302 larged cells could account for the increased level of damage we observed in enlarged cells.  
303 Removal of p53 in size-constrained cells modestly increases the number of cells with 1-2  
304  $\gamma$ H2AX foci but was not sufficient to cause high levels of damage (e.g., cells with  $\geq 3$  foci). In  
305 contrast, p53 removal strongly exacerbated the level of severe endogenous DNA damage  
306 observed in enlarged cells (**Figure 6G**). Together, these data demonstrate that spontaneous  
307 DNA damage arises more frequently in enlarged G<sub>1</sub> cells, and p53-dependent signaling—  
308 although inefficient—is required to repair it. Similarly, p53 knockdown is sufficient to increase  
309 the level of damage observed in both size-constrained and enlarged cells treated with doxo-  
310 rubicin (**Figure 6H, Figure S6D**), indicating that p53-dependent DNA damage repair reduces  
311 DNA damage levels during exposure to genotoxic agents. Importantly, enlarged cells wherein  
312 p53 is knocked down still harbor higher levels of damage than the corresponding size-con-  
313 strained cells (**Figure 6G-6H, Figure S6D**). This indicates that—although p53 signaling de-  
314 fects may contribute to the high levels of DNA damage observed in enlarged cells— other  
315 factors also contribute to the high propensity for DNA damage accumulation observed in en-  
316 larged cells.

317 The elevated  $\gamma$ H2AX levels we observed in enlarged cells upon doxorubicin treatment  
318 are ATM-dependent (**Figure S6E**), indicating that doxorubicin causes double-stranded breaks  
319 (DSBs) [55]. We therefore investigated whether the DSB repair pathway was robustly main-  
320 tained in enlarged cells. During G<sub>1</sub>, DSBs are repaired via non-homologous end-joining  
321 (NHEJ), which involves the formation of discrete 53BP1 foci at damage sites [56]. These foci  
322 then act as adaptors for downstream signaling [57]. To probe the DSB repair pathway in en-  
323 larged G<sub>1</sub> cells, we measured 53BP1 foci formation upon doxorubicin treatment. We found  
324 that a significant portion of doxorubicin-treated enlarged cells fail to form 53BP1 foci, whereas  
325 size-constrained cells do so proficiently (**Figure 6I-6J**). Thus, an upstream component of the  
326 DSB repair pathway is impaired in enlarged cells. Moreover, because 53BP1 regulates the  
327 accumulation of p53 in response to DSBs [56], enlarged cells' failure to stabilize p53 upon  
328 damage may be explained by deficits in 53BP1 foci formation.

329 To investigate whether the repair defects we observed translate to inefficient damage  
330 resolution, we treated enlarged and size-constrained cells with doxorubicin for 16 hours fol-  
331 lowed by a 4-hour washout and measured  $\gamma$ H2AX foci. We found that size-constrained cells  
332 significantly reduce damage following doxorubicin removal, whereas enlarged cells fail to do  
333 so (**Figure 6K, Figure S6F**). Thus, impaired damage repair pathways in enlarged cells

334 correlate with high levels of DNA damage and less efficient damage resolution. Together,  
335 these data show that blunted DNA damage signaling and an increased propensity for DNA  
336 breakage are established prior to S-phase in enlarged cells. We propose that this renders  
337 large cells hypersensitive to exogenous genotoxic insults and endogenous sources of damage  
338 like reactive oxygen species, transcription, and DNA replication.

339

## 340 **Discussion**

341 In this study, we used reversible G<sub>1</sub> cell cycle arrests coupled with different strategies  
342 for constraining cell size to study the effects of excess cell size on mammalian cell cycle pro-  
343 gression. Based on this experimental system, we describe how unchecked growth in G<sub>1</sub>  
344 causes cell cycle failure in non-transformed and transformed cell lines. Increased cell size  
345 drives the expression of p21, a Cdk1/2 inhibitor that signals G<sub>1</sub> cell cycle arrest. In enlarged  
346 RPE1 cells, this is not sufficient to block cell cycle progression in all cells, whereas this is  
347 sufficient to block S-phase entry in the majority of enlarged MCF7 cells. In both cases, cell  
348 cycle progression through S-phase in enlarged cells causes increased genomic instability re-  
349 sulting from mitotic failures. Both cell lines fail to induce p53 robustly following DNA damage,  
350 demonstrating defects in a major pathway that drives p21 expression. We further show that  
351 excess size renders cells prone to accumulating DNA damage and interferes with efficient  
352 DNA damage repair, making enlarged cells highly sensitive to DNA damage.

353 We find that enlarged G<sub>1</sub> RPE1 cells display heterogeneous cell cycle entry dynamics:  
354 whereas some cells are able to enter the cell cycle, others undergo prolonged G<sub>1</sub> arrests. The  
355 population of cells wherein cell cycle entry is delayed is eliminated upon removal of p53, sug-  
356 gesting that differences in p53 signaling may account for the heterogeneity we observe in  
357 RPE1 cells. Based on the p53 signaling defects we observe in a bulk measurement of en-  
358 larged cells, these data fit a model in which some cells maintain robust p53 signaling, resulting  
359 in G<sub>1</sub> cell cycle arrest, whereas others display weakened p53 signaling and enter the cell cycle.  
360 This is consistent with observations from others demonstrating that p53-dependent p21 ex-  
361 pression is heterogeneous in RPE1 cells [58]. This model may also explain the discrepancy  
362 between the cell cycle entry behaviors we observed in RPE1 and MCF7 cells. Whereas most  
363 RPE1 cells enter the cell cycle, the majority of enlarged MCF7 cells fail to progress to S-phase.  
364 Though both cell lines harbor p53 signaling defects and elevated p21 levels, p21 expression  
365 in MCF7 cells is not affected by p53 depletion. Thus, MCF7 cells may be able to upregulate  
366 p21 more robustly— even in the absence of adequate p53 signaling—thereby resulting in a  
367 greater degree of G<sub>1</sub> cell cycle arrest. Together, our findings from both cell lines indicate that  
368 p21 expression protects against inappropriate cell cycle entry and subsequent mitotic failures  
369 in enlarged cells.

370 Our proteomic analysis of G<sub>1</sub> arrested large cells revealed that large cells have high  
371 protein levels of E2F transcriptional targets involved in DNA replication relative to size-con-  
372 strained cells. Thus, DNA replication machinery is not limiting for proliferation in excessively  
373 large cells. Because p21—which should repress E2F gene expression through the inhibition  
374 of cyclin:Cdk complexes [13]— is elevated in enlarged cells, this suggests that opposing  
375 mechanisms drive E2F protein expression. This may be related to the recent observation that  
376 Rb concentrations are reduced as cells grow larger [19, 20]. In cells that have undergone  
377 unchecked G<sub>1</sub> growth, Rb dilution may allow the untimely de-repression of E2F target genes.  
378 Such a mechanism would be independent of p21 levels, which inhibits E2F indirectly through  
379 Rb. Alternatively, high p21 levels may be overcome by the high levels of Cdk4 and cyclin D1  
380 we observed in enlarged cells (**Figure S2B**), which others have shown is sufficient to accel-  
381 erate the E2F transcriptional program [27]. Lastly, because Torin1-treatment and contact in-  
382 hibition both limit mTOR signaling [59], growth restriction may repress E2F target expression  
383 in size-constrained cells. Indeed, others have found that a combination of Cdk4/6 inhibition  
384 and mTORC1/2 inhibition represses E2F-mediated transcription more so than Cdk4/6 inhibi-  
385 tion alone [60], and recent proteomic measurements of rapamycin-treated cells revealed the  
386 suppression of DNA replication-related proteins [61].

387 We show that excess G<sub>1</sub> cell size impairs DNA damage-induced activation of the p53  
388 pathway, which contributes to inefficient DNA damage repair and high levels of damage in  
389 enlarged cells. We also found that enlarged cells fail to form 53BP1 foci in response to doxo-  
390 rubicin, whereas size-constrained cells do so proficiently. These results are consistent with  
391 previous observations that aged G<sub>1</sub> cells—which are larger than healthy cells [62]—also fail  
392 to recruit 53BP1 to DSB sites [63]. This may be due to altered epigenetic conditions in en-  
393 larged cells given that 53BP1 foci formation requires specific histone modifications [57]. Alter-  
394 natively, nuclear dilution could impede 53BP1 foci formation [64]. Because 53BP1 has been  
395 reported to enhance p53 signaling [56, 64-66], the failure to form 53BP1 foci at damage sites  
396 may contribute to the blunted p53 response we observe in enlarged cells.

397 When cells grow beyond their physiological size, macromolecule production becomes  
398 limited by DNA template availability [7]. Our observation that enlarged cells fail to robustly  
399 signal through DNA damage pathways suggests that cellular processes that generate signals  
400 from DNA itself (like DNA damage recognition and repair) may also become limited when the  
401 concentration of DNA decreases relative to cell volume. This has also been observed in the  
402 context of the spindle assembly checkpoint (SAC), where the kinetochore to cytoplasm ratio  
403 determines the strength of SAC signaling [67, 68]. Thus, the effect of cell size on other DNA-  
404 dependent processes should be studied further and may provide additional insight into why  
405 enlarged cells lose proliferative potential.

406 Others have hypothesized that Cdk4/6 inhibition induces replication stress due to  
407 downregulation of replisome components and origin licensing defects [11]. In agreement with  
408 these observations, our data demonstrate that replisome components are depleted over time  
409 during G<sub>1</sub> arrest. Still, size-constrained cells contain even lower levels of replisome compo-  
410 nents than enlarged cells but have significantly lower rates of cell cycle failure upon G<sub>1</sub> arrest  
411 release. Our data therefore do not support a model wherein replication machinery becomes  
412 limiting for DNA replication in enlarged cells. This finding reopens the question of why enlarged  
413 cells encounter replication stress during S-phase. Our data indicate that the DNA in enlarged  
414 G<sub>1</sub> cells is damage-prone, due at least in part to defects in DNA damage repair signaling.  
415 Thus, the DNA damage sensitivity that we and others [11, 12] have observed in enlarged cells  
416 likely arises independent of DNA replication. We propose that DNA replication—an inherently  
417 damage-prone process [69]— is a general genotoxic stress that exposes the fragility of en-  
418 larged cells' DNA in a manner similar to doxorubicin treatment. These defects may lead to  
419 persistent replication-induced breaks that would normally be mitigated, leading to high levels  
420 of irreparable DNA damage in cells entering G<sub>2</sub>. Defects in DNA damage-dependent p53 sig-  
421 naling may allow enlarged cells to enter mitosis in the presence of unresolved replication-  
422 acquired damage, culminating in failed mitoses and permanent cell cycle exit.

423 Lastly, our results present important clinical implications for the mechanism by which  
424 Cdk4/6 inhibitors induce permanent cell cycle withdrawal in cancer cells. Palbociclib and other  
425 Cdk4/6 inhibitors are frequently deployed as a treatment for HR+ and HER2– breast cancers  
426 [70]. Though others have shown that prolonged Cdk4/6 inhibition causes cell cycle failure [11,  
427 44, 47, 50, 71], our data demonstrate that this is a consequence of increased cell size and is  
428 not strictly due to Cdk4/6 inhibition. This distinction suggests that Cdk4/6 inhibition may be a  
429 more useful therapeutic strategy for tumors containing cells that are susceptible to unchecked  
430 biomass accumulation. Consistent with this notion, others have shown that oncogenic muta-  
431 tions that amplify cell growth sensitize cells to palbociclib treatment [50], and hyperactivation  
432 of mTOR (which also amplifies cell growth) sensitizes ER+ breast cancer cells to Cdk4/6 inhi-  
433 bition in terms of permanent cell cycle withdrawal [72]. Conversely, our findings suggest that  
434 Cdk4/6 inhibition may not be a useful strategy for treating tumors wherein biomass accumu-  
435 lation is limited physically or through changes in signaling, as we observed in NALM6 cells.  
436 Lastly, because the loss of p53 in enlarged cells causes chromosome segregation defects but  
437 also allows continued cell cycle progression, our results suggest that Cdk4/6 inhibition may  
438 worsen chromosome instability in p53-null tumors wherein cells are able to grow large. Indeed,  
439 others have found that removal of p53 supports long-term proliferation following Cdk4/6 inhib-  
440 itor withdrawal [47]. Thus, this work identifies potential limitations for using Cdk4/6 inhibitors  
441 in a therapeutic context and suggests caution in drawing clinical conclusions from *in vitro* ex-  
442 periments using these drugs.

443 **STAR Methods**

444 **Key Resources Table**

| REAGENT or RESOURCE                                      | SOURCE                    | IDENTIFIER       |
|----------------------------------------------------------|---------------------------|------------------|
| <b>Antibodies</b>                                        |                           |                  |
| Rb                                                       | Cell Signaling Technology | #9309            |
| cyclin A2                                                | Santa Cruz                | sc-751           |
| GAPDH                                                    | Abcam                     | ab8245           |
| vinculin                                                 | Santa Cruz                | sc-73614         |
| p21                                                      | Cell Signaling Technology | #2947            |
| MCM2                                                     | Cell Signaling Technology | #3619            |
| cyclin D1                                                | Abcam                     | ab18521          |
| p16                                                      | Cell Signaling Technology | #80772           |
| phospho-histone H2AX (rabbit)                            | Cell Signaling Technology | #2566            |
| phospho-histone H2AX (mouse)                             | Millipore                 | 05-636           |
| histone H3                                               | Abcam                     | Ab18521          |
| p53                                                      | Santa Cruz                | Sc-126           |
| Anti-mouse IgG HRP                                       | BioRad                    | 170-6516         |
| Anti-rabbit IgG HRP                                      | BioRad                    | 170-6515         |
| Anti-rabbit AlexaFluor488                                | Thermo Fisher             |                  |
| Anti-mouse AlexaFluor568                                 | Thermo Fisher             |                  |
|                                                          |                           |                  |
| <b>Chemicals, peptides, and recombinant proteins</b>     |                           |                  |
| palbociclib                                              | Sigma                     | PZ0383           |
| Torin1                                                   | Sigma                     | 475991           |
| doxorubicin                                              | Sigma                     | D1515            |
| camptothecin                                             | Sigma                     | 208925           |
| KU55933 (ATM inhibitor)                                  | Sigma                     | 1109             |
| AZ20 (ATR inhibitor)                                     | Selleckchem               | S7050            |
| nutlin-3a                                                | Sigma                     | SML0580          |
| Hoechst 33342                                            | Thermo Fisher             | H3570            |
| FxCycle FarRed DNA Stain                                 | Thermo Fisher             | F10348           |
| Lipofectamine RNAiMax                                    | Thermo Fisher             | 13778100         |
| NuPAGE LDS sample buffer (4x)                            | Thermo Fisher             | NP0007           |
| Pierce protease and phosphatase inhibitor mini tablets   | Thermo Fisher             | A32959           |
| Pierce RIPA lysis buffer                                 | Thermo Fisher             | 89900            |
| 20x MES SDS running buffer                               | Thermo Fisher             | B000102          |
| 20x MOPS SDS running buffer                              | Thermo Fisher             | B0002            |
|                                                          |                           |                  |
| <b>Critical commercial assays</b>                        |                           |                  |
| Click-iT EdU AlexaFluor-488 Flow Cytometry Assay Kit     | Thermo Fisher             | C10420           |
| Subcellular Protein Fractionation Kit for Cultured Cells | Thermo Fisher             | 78840            |
| TMTpro 16plex                                            | Thermo Fisher             | 44522            |
|                                                          |                           |                  |
| <b>Deposited data</b>                                    |                           |                  |
| TMT proteomics in enlarged/size-constrained cells        | This paper                | PRIDE: PXD034934 |
|                                                          |                           |                  |
| <b>Experimental models: Cell lines</b>                   |                           |                  |

|                                 |                                                                                           |                  |
|---------------------------------|-------------------------------------------------------------------------------------------|------------------|
| hTERT RPE1 WT                   | ATCC                                                                                      | CRL-4000         |
| hTERT RPE1 FUCCI                | Laboratory of Randy King                                                                  | N/A              |
| MCF7                            | ATCC                                                                                      | HTB-22           |
| NALM6                           | Laboratory of Mike Tyers                                                                  | N/A              |
| <b>Oligonucleotides</b>         |                                                                                           |                  |
| ON-TARGETplus Human TP53        | Dharmacon                                                                                 | J-003329-14-0002 |
| ON-TARGETplus Human CDKN1A      | Dharmacon                                                                                 | J-003471-09-0002 |
| siGENOME non-targeting siRNA #5 | Dharmacon                                                                                 | D-001210-05-05   |
| <b>Software and algorithms</b>  |                                                                                           |                  |
| FIJI                            | <a href="https://imagej.net/software/fiji/">https://imagej.net/software/fiji/</a>         | N/A              |
| R                               | <a href="https://www.r-project.org/">https://www.r-project.org/</a>                       | N/A              |
| FlowJo                          | BD Biosciences                                                                            | N/A              |
| MaxQuant                        | Laboratory of Matthias Mann                                                               | N/A              |
| ShinyGO 0.76                    | <a href="http://bioinformatics.sdstate.edu/go/">http://bioinformatics.sdstate.edu/go/</a> | N/A              |

445

446 *Cell culture, growth conditions, and drug treatments*

447 Cell lines used in this work (hTERT-RPE1 WT, hTERT-RPE1 FUCCI, MCF7, NALM6) were  
 448 cultured in a humidified incubator at 37°C in the presence of 5% CO<sub>2</sub>. Wild-type hTERT-RPE1  
 449 and MCF7 cells were obtained directly from ATCC. hTERT-RPE1 FUCCI cells were a gift from  
 450 Randall W. King with permission from the RIKEN Institute. NALM6 cells were a gift from Mike  
 451 Tyers.

452

453 RPE1 cells were cultured in DMEM/F12 with GlutaMAX (Gibco) + 10% FBS and 1% penicil-  
 454 lin/streptomycin. RPE1 cells that were allowed to grow large were seeded at low density (5,000  
 455 – 10,000 cells/cm<sup>2</sup>) and treated with 1 μM palbociclib for 6 days. Cells that were allowed to  
 456 grow large were maintained at subconfluency for the duration of the experiment. RPE1 cells  
 457 that were size-constrained using Torin1 treatment were seeded at 30,000 cells/cm<sup>2</sup> prior to  
 458 treating cells with 1 μM palbociclib + 500 nM Torin1. For contact inhibition experiments, RPE1  
 459 cells were seeded at 79,000 cells/cm<sup>2</sup> for 48 hours before treating cells with 1 μM palbociclib.  
 460 Note that this is ~95% confluency after 24 hours. Cells were seeded at this density and allowed  
 461 to grow for 48 hours because seeding at higher densities caused them to slough off the dish.  
 462 After 6 days, cells were re-seeded at 30,000 cells/cm<sup>2</sup> in the presence of 1 μM palbociclib for  
 463 an additional 24 hours to recover and re-attach. For release experiments, cells were then  
 464 washed 3x in media and released into media without drugs.

465

466 MCF7 cells were cultured in DMEM with GlutaMAX (Gibco) + 10% FBS and 1% penicil-  
 467 lin/streptomycin. MCF7 cells were seeded at 30,000 cells/cm<sup>2</sup> prior to treating cells with 2 μM

468 palbociclib for 6 days. To constrain cell size, MCF7 cells were co-treated with 12 nM Torin1.  
469 Note that MCF7 cells are highly sensitive to mTOR inhibition, and higher doses caused signif-  
470 icant cell death. For release experiments, cells were washed 3x in media and released into  
471 media without drugs.

472

473 NALM6 cells were cultured in RPMI-1640 with GlutaMAX (Gibco) + 10% FBS and 1% penicil-  
474 lin/streptomycin. NALM6 cells were maintained between 100,000 cells/mL and  $1 \times 10^6$   
475 cells/mL. Note that NALM6 cells are sensitive to different FBS sources and doubling time (~24  
476 hours) should be confirmed for a given FBS source before use.

477

#### 478 *siRNA transfections*

479 Cells were reverse-transfected using Lipofectamine RNAiMax (Invitrogen 13778100) accord-  
480 ing to manufacturer's instructions with the following siRNAs at a final concentration of 25 nM.  
481 Cells were transfected for 24 hours for all experiments. Knockdowns were confirmed by west-  
482 ern blotting. For G<sub>1</sub> arrest experiments, transfections were carried out in the constant presence  
483 of palbociclib.

484

#### 485 *Cell size measurements*

486 Cell size was measured on a Multisizer 4e (Beckman) using Isotone II (Beckman) as a diluent  
487 and a 100  $\mu$ m aperture. For experiments in RPE1 cells, trypsinized cells were resuspended in  
488 DMEM/F12 and diluted in 10 mL Isotone II before measuring. MCF7 cells were trypsinized  
489 and diluted in Isotone II without re-suspending in media to minimize clumping. NALM6 cells  
490 were directly measured in RPMI-1640 diluted in Isotone II. Cell volume distributions were an-  
491 alyzed using a custom R script.

492

#### 493 *Crystal violet staining-based colony formation assays*

494 For colony formation experiments, cells were seeded at ~260 cells/cm<sup>2</sup> in the presence of  
495 palbociclib (1  $\mu$ M for RPE1 cells; 2  $\mu$ M for MCF7 cells) for 24 hours to re-attach. Cells were  
496 then gently washed 3x in media and released into fresh media. For doxorubicin and camptoth-  
497 ecin sensitization experiments in RPE1 cells, cells were released into 3.125 nM doxorubicin  
498 or 0.5 nM camptothecin, respectively. Cells were allowed to grow for 10-12 days before wash-  
499 ing 1x with ice-cold PBS followed by incubation with ice-cold 100% methanol for 10 minutes  
500 on ice. The methanol was aspirated, and then cells were incubated with 0.5% crystal violet  
501 (w/v) in 25% methanol at room temperature for 10 minutes. Cells were washed with DI water  
502 until clear. Plates were dried at room temperature prior to imaging. Colony formation was  
503 quantified using the automated ColonyArea macro in ImageJ [73].

504

505 *SDS-PAGE and western blotting*

506 Cells were lysed in RIPA lysis buffer (Invitrogen 89900) supplemented with 1x protease/phos-  
507 phatase inhibitor tablets (Pierce A32959) by periodic vortexing on ice. Lysates were clarified  
508 by centrifugation at 13,000rpm for 10 minutes at 4°C. Lysates were transferred to fresh tubes,  
509 and protein concentrations were measured using a BCA assay kit according to manufacturer's  
510 instructions (Pierce 23225). Lysates were combined with 4x LDS sample buffer (Invitrogen  
511 NP0007) + 25 mM DTT to a final concentration of 1x and were boiled at 95°C for 10 minutes.  
512 Equal masses of protein (except for histone-normalized experiments, where lysate was de-  
513 rived from an equal number of cells) were loaded on Bolt 4-12% Bis-Tris gels (Invitrogen) and  
514 resolved in either 1x MES or MOPS SDS running buffer (Invitrogen B000102, B0002). Proteins  
515 were transferred to PVDF membranes at 250 mA at 4°C for 1 hr 15 min using a wet transfer  
516 apparatus. Membranes were blocked in 5% milk in TBS-T before incubating with primary an-  
517 tibodies in 5% milk in TBS-T at 4°C with agitation overnight. Membranes were washed 3x in  
518 TBS-T for ~10 minutes each, incubated with secondary mouse or rabbit IgG HRP-conjugated  
519 antibodies in 5% milk in TBS-T for 45-60 minutes, washed again, and then developed using  
520 enhanced chemiluminescent substrate solutions as described by the manufacturer (Thermo  
521 34095, Thermo 34578).

522

523 *Chromatin fractionation*

524 Isolation of chromatin bound MCM2 and PCNA was carried out using a subcellular fractiona-  
525 tionation kit for cultured cells (Thermo 78840) according to the manufacturer's protocol. Iso-  
526 lated fractions were diluted to 1x in LDS sample buffer (Invitrogen NP0007) + 25 mM DTT and  
527 were analyzed by SDS-PAGE and western blotting as described above.

528

529 *Time lapse fluorescence imaging*

530 G<sub>1</sub> arrested cells were plated in the presence of palbociclib on an 8-well coverslip dish (Ibidi  
531 80826) to be approximately 70% confluent after 24 hours. For siRNA transfection experiments,  
532 cells were transfected at the time of plating on coverslip dishes. For cell cycle release experi-  
533 ments, compounds (and siRNAs) were washed out and cells were imaged immediately follow-  
534 ing the addition of fresh media. Coverslips were inserted into a covered cage microscope  
535 incubator (Okolabs) with temperature and humidity control at 37°C and 5% CO<sub>2</sub> and mounted  
536 on a motorized microscope stage (Prior ProScan HLD117NN). All images were collected on  
537 a Nikon Ti motorized inverted microscope equipped with a piezo z-drive (Prior), a 20x/0.75 NA  
538 S Fluor air objective lens, and the Perfect Focus system. mCherry fluorescence was excited  
539 with a Lumencor Spectra III light engine using a 555/28 excitation filter and a 641/75 emission  
540 filter (Semrock). mAG1 fluorescence was excited using a 475/28 excitation filter and a 515/30  
541 emission filter (Semrock). Images were acquired with an Orca Fusion BT camera controlled



542 with Nikon Elements image acquisition software. Four fields of view were collected per condi-  
543 tion, and brightfield and/or fluorescence images were captured at 5-6 minute intervals.

544

#### 545 *Cell fixation and staining*

#### 546 Immunostaining and imaging

547 Cells were seeded onto glass coverslips and treated as indicated. Cells were then fixed with  
548 4% formaldehyde solution for 10 min and permeabilized with 0.25% Triton X-100 in PBS for  
549 10 min. Fixed cells were washed three times for 5 minutes with 0.05% Triton X-100 in PBS  
550 and blocked with 1% BSA in PBS for 30 min at room temperature. For staining of only  $\gamma$ H2AX,  
551 cells were incubated with the primary antibody (CST #2577, 1:1000) in blocking solution for 1  
552 hour at room temperature. Cells were later washed three times for 5 minutes with 0.05% Triton  
553 X-100 in PBS. For detection of the primary antibody, cells were incubated with an  
554 AlexaFluor488-conjugated secondary rabbit antibody (Thermo Fischer Scientific, 1:1000) in  
555 blocking solution for 1 hour at room temperature. For co-staining of  $\gamma$ H2AX and 53BP1, cells  
556 were incubated with a  $\gamma$ H2AX primary mouse antibody (Millipore 05-636, 1:500) and a 53BP1  
557 primary rabbit antibody (Abcam ab21083, 1:400) in blocking solution for 1 hour at room tem-  
558 perature. For detection of the primary antibodies, cells were incubated with an AlexaFluor568-  
559 conjugated secondary mouse antibody (Thermo Fisher Scientific, 1:1000) and an  
560 AlexaFluor488-conjugated secondary rabbit antibody (1:400) in blocking solution for 1 hour at  
561 room temperature. Cells were then washed once with 0.05% Triton X-100 in PBS for 5 minutes  
562 and washed twice with 0.05% Triton X-100 + Hoechst 33342 (0.1  $\mu$ g/mL) in PBS for 5 minutes.  
563 Coverslips were washed shortly with Milli-Q water and mounted onto glass slides using  
564 Vectashield mounting medium (Vector Laboratories).

565

566 Microscopy was performed on a Nikon Eclipse Ti-E inverted microscope using a 60x/NA 1.40  
567 oil objective. Hoechst fluorescence was excited with a Lumencor SpectraX light engine using  
568 a 390/18 nm excitation filter and a 460/50 nm emission filter (AHF Analysentechnik).  
569 AlexaFluor488 fluorescence was excited using a 470/40 nm excitation filter and a 520/35 nm  
570 emission filter (AHF Analysentechnik). AlexaFluor568 fluorescence was excited using a  
571 575/27 nm excitation filter and a 641/75 nm emission filter (AHF Analysentechnik). Images  
572 were acquired with a Hamamatsu ORCA Flash 4.0 camera controlled by the ImageJ  $\mu$ Man-  
573 ager software [74]. Five to ten fields of view were collected per condition.

574

#### 575 EdU staining and flow cytometry-based detection

576 MCF7 and NALM6 cells were washed out of palbociclib-containing media and into 10  $\mu$ M EdU-  
577 alkyne for three days. Cells were then collected, fixed, and labeled with AlexaFluor-488-azide  
578 according to the manufacturer's protocol (Thermo C10632). EdU incorporation was analyzed

579 using a BD FACSCanto cell analyzer. Cells were co-stained for DNA using FxCycle FarRed  
580 (Thermo F10348) in the presence of RNase A to gate for single cells. Note that this experi-  
581 mental setup was not viable in RPE1 cells due to cell lysis during fixation and sample prepa-  
582 ration.

583

#### 584 Fixed cell imaging of nuclear abnormalities

585 For analysis of nuclear defects in MCF7 cells, enlarged and size-constrained MCF7 cells were  
586 seeded in a black-walled 96-well plate (Corning 3606) in the presence of palbociclib for 24  
587 hours. Cells were then washed 3x with media and released from drug treatment for two days.  
588 Cells were then fixed (10% formalin and 0.1% Triton X-100 in PBS) and DNA was stained with  
589 Hoechst 33342 (1 µg/ml) for 45 minutes in the dark before imaging with an ImageXpress Micro  
590 high content microscope (Molecular Devices) equipped with a 20x objective and the DAPI  
591 filter. At least 15 images were collected and analyzed for each condition.

592

#### 593 *TMT mass spectrometry sample preparation*

594 Samples were prepared essentially as described previously [75]: Cells were cultured as de-  
595 scribed in biological triplicate. Cell pellets were re-suspended in urea lysis buffer: 8M urea,  
596 200 mM EPPS pH 8.0, Pierce protease inhibitor tablets (Thermo Fisher Scientific, A32963),  
597 and Pierce phosphatase inhibitor tablets (Thermo Fisher Scientific, A32957). Lysates were  
598 passed through a 21-gauge needle 20 times, and protein concentrations were measured by  
599 BCA assay (Thermo Fisher Scientific). One hundred micrograms of protein were reduced with  
600 5 mM tris-2-carboxyethyl-phosphine (TCEP) at room temperature for 15 min, alkylated with 10  
601 mM iodoacetamide at room temperature for 30 min in the dark, and were quenched with 15  
602 mM DTT for 15 min at room temperature. Proteins were precipitated using a methanol/chloro-  
603 form extraction. Pelleted proteins were resuspended in 100 µL 200 mM EPPS, pH 8.0. LysC  
604 (Wako 125-05061) was added at a 1:50 enzyme/protein ratio, and samples were incubated  
605 overnight at room temperature with agitation. Following overnight incubation, trypsin  
606 (Promega V5111) was added at a 1:100 enzyme/protein ratio, and samples were incubated  
607 for an additional 6 h at 37 °C. Tryptic digestion was halted by the addition of acetonitrile (ACN).  
608 Tandem mass tag (TMT) isobaric reagents (TMTpro 16plex Thermo Fisher Scientific 44522)  
609 were dissolved in anhydrous ACN to a final concentration of 20 mg/mL, of which a unique  
610 TMT label was added at a 2:1 label:peptide ratio. Peptides were incubated at room tempera-  
611 ture for one hour with vortexing at the 30-minute interval. TMT labeling reactions were  
612 quenched by the addition of 10 µL of 5% hydroxylamine. Equal amounts of each sample were  
613 combined at a 1:1 ratio across all channels and dried by vacuum centrifugation. Samples were  
614 re-suspended in 1% formic acid and desalted using a 50 mg 1 cc SepPak C18 cartridge (Wa-  
615 ters WAT054955) following manufacture's instruction. Briefly, peptides were washed with 5%

616 ACN and 0.1% formic acid, eluted with 50% ACN and 0.1% formic acid and dried. Subse-  
617 quently, peptides were subjected to fractionation with basic pH reverse phase HPLC chroma-  
618 tography using a linear gradient (5-40% acetonitrile, 9mM ammonium bicarbonate) on XBridge  
619 peptide BEH C18 column (130 Å, 3.5 µm, 4.6 mm X 250 mm, Waters). Fractions were col-  
620 lected in 96 well format plate and consolidated on 12 fractions, dried and re-suspended in 5%  
621 acetonitrile and 5% formic acid for LC-MS/MS processing.

622

### 623 *TMT Mass Spectrometry Analysis*

624 LC-MS/MS analysis was performed on an Orbitrap Fusion Lumos Tribrid mass spectrometer  
625 (Thermo Scientific) coupled to an Acquity UPLC M-class system (Waters). Peptides were  
626 loaded on a commercial trap column (Symmetry C18, 100Å, 5µm, 180 µm\*20mm, Waters)  
627 and separated on a commercial column (HSS T3, 100Å, 1.8µm, 75 µm\*250mm, Waters) using  
628 a 113 min gradient from 5% to 35% acetonitrile at a flow rate of 300 nL/min. The mass spec-  
629 trometer was operated in data dependent acquisition (DDA) mode with 2s cycle time. MS1  
630 data were collected in the Orbitrap (400-1400 m/z) at 60'000 resolution, 50 ms injection time  
631 and 4e5 AGC target. Ions with charge states between two and six were isolated in quadrupole  
632 (isolation window 0.5 m/z), fragmented (CID, NCE 35%) and MS2 scans were collected in the  
633 ion trap (Turbo, maximum injection time 120 ms, AGC 1.5e4); 60s of dynamic exclusion was  
634 used. MS3 quantification scans were performed with ten notches; ions were isolated in the  
635 quadrupole (2 m/z), fragmented (HCD, NCE 45%) and identified in the Orbitrap (50'000 reso-  
636 lution, maximum injection time 86ms and AGC 2e5).

637

### 638 *Mass Spectrometry Data Analysis*

639 Acquired spectra were searched using the MaxQuant software package version 2.1.0.0 em-  
640 bedded with the Andromeda search engine [76] against the human proteome reference da-  
641 taset (<http://www.uniprot.org/>, downloaded on 06.04.2021) extended with reverse decoy se-  
642 quences. The search parameters were set to include only full tryptic peptides (Trypsin/P),  
643 maximum two missed cleavage, carbamidomethyl and TMT16 as static peptide modification,  
644 oxidation (M) and acetylation (Protein N-term). Precursor and fragment ion tolerance was set  
645 respectively to 4.5ppm and 20ppm. False discovery rate of <1% was used at the PSM and  
646 protein level. Reporter intensities for proteins identified with at least 2 peptides (5884) were  
647 normalized, and missing values (1.7%) were imputed using random sampling from a normal  
648 distribution generated from 1% less intense values. ANOVA statistical tests were performed  
649 to compare protein profiles in all conditions. *P*-values were corrected using the Benjamini-  
650 Hochberg method [77]. Matrices with protein intensities and ANOVA statistical tests are re-  
651 ported in **Supplemental Data Table 1**.

652

653 *Gene Enrichment Analysis*

654 Gene enrichment analysis of the subset of proteins identified in the proteomics with a signifi-  
655 cant (adj. p-value < 0.05) increase in abundance with a  $\log_2(\text{FC}) \geq 1$  using both size-constraint  
656 methods was performed using the ShinyGO tool for biological processes [78].

657

658 ***Supplemental Material***

659 Supplemental Figures S1-S6

660 Supplemental Data Table 1 : TMT proteomics (full table)

661 Supplemental Data Table 2 : Decreasing proteins

662 Supplemental Data Table 3 : Increasing proteins

663

664 ***Data availability***

665 Mass spectrometry data have been deposited to the ProteomeXchange Consortium with the  
666 identifier PXD034934. All other raw data and reagents generated from this study are available  
667 from the corresponding author upon request.

668

669 ***Acknowledgements***

670 We are grateful to R. King and M. Tyers for sharing cell lines, M. Peter for sharing reagents  
671 and laboratory infrastructure, R. Meier and T. Schwarz from ScopeM for assistance with mi-  
672 croscopy experiments, A. Dittmann and B. Roschitzki from Functional Genomics Center Zü-  
673 rich (FGCZ) for laboratory support and maintenance of the mass spectrometry facility. This  
674 work was supported by an ETH Postdoctoral Fellowship to S.M. (1-008383) and a SNSF Ec-  
675 cellenza grant to G.E.N. (PCEFP3\_187003).

676

677 ***Author Contributions***

678 Conceptualization: S.M. and G.E.N.; Methodology: S.M., M.E.E., and F.U.; Investigation: S.M.,  
679 M.E.E., and F.U.; Writing – Original Draft: S.M. and G.E.N.; Writing – Reviewing & Editing:  
680 S.M., M.E.E, F.U., and G.E.N.; Funding Acquisition: S.M. and G.E.N.; Supervision: G.E.N.

681

682

683

684

685

686

687

688

689

690 **Figure Legends**

691

692 **Figure 1:** *Continued cell growth induces permanent cell cycle exit following a prolonged G<sub>1</sub>*  
693 *arrest*

694 **(A)** Schematic for constraining cell size in the presence of palbociclib using mTOR inhibition  
695 by Torin1 or contact inhibition. To grow cells large, cells were plated and maintained at low  
696 density while being treated with palbociclib alone for 6 days. To constrain cell size using  
697 Torin1, cells were plated at a low density and treated with palbociclib + Torin1 for 6 days. To  
698 constrain cell size using contact inhibition, cells were plated at high density and treated with  
699 palbociclib for 6 days. In all cases, media and drugs were replaced every 1-3 days. After 6  
700 days, cells were re-seeded at low density (if necessary) and switched to media containing  
701 palbociclib alone for 24 hours before performing G<sub>1</sub> experiments or releasing cells into fresh  
702 media without palbociclib for release experiments. For release experiments, cells were  
703 washed three times in media prior to release.

704 **(B)** Coulter Counter-based cell volume measurements for untreated (cycling), palbociclib-  
705 treated, palbociclib + Torin1 treated, and palbociclib + contact inhibition RPE1 cells after a 6-  
706 day treatment.

707 **(C)** Long-term colony formation assay. RPE1 cells were treated as in **(A)** and for 6 days plus  
708 1 day for recovery and were then seeded at 250 cells/cm<sup>2</sup> in the absence of drugs for 10 days.  
709 Cells were then crystal violet stained to visualize colonies.

710 **(D)** Quantification of **(C)**, n = 4. \* : p = 0.01, \*\*\*\* : p < 0.0001. p-values were calculated by one-  
711 way ANOVA followed by Tukey's multiple comparisons test.

712 **(E)** Cell cycle release time course following release in size-constrained (contact-inhibited and  
713 Torin1-treated) and enlarged RPE1 cells. After 6 days + 1 day of recovery, cells were released  
714 into fresh media without palbociclib and collected at the indicated time points. Cell lysates  
715 were analyzed by western blot for the indicated protein abundances. GAPDH and Ponceau  
716 membrane staining were used as loading controls.

717 **(F)** RPE1 FUCCI cells were treated as in **(A)** and imaged following release from G<sub>1</sub> arrest.  
718 Cells were tracked for 18 hours, and cumulative frequency curves were plotted for cells that  
719 had started accumulating mAG1-geminin<sup>1-110</sup> (the S/G<sub>2</sub>/M marker) based on the fraction of cells  
720 at each time point that were above an arbitrary mAG1-geminin<sup>1-110</sup> intensity threshold. At least  
721 45 cells were analyzed for each condition at each time point.

722 **(G)** The timing from G<sub>1</sub> release (start of imaging) until mitotic entry for the first 40 cells that  
723 reach mitosis for each condition in the experiment described in **(F)**. Mitotic entry was defined  
724 as the frame at which nuclear envelope breakdown (NEB) occurred. p-value was calculated  
725 using a two-tailed unpaired t-test. \*\*\*\* : p < 0.0001.

726 (H) For cells that reached mitosis following G<sub>1</sub> release, mitotic duration (the time from NEB to  
727 flattening or division) was quantified, and mitotic fates (normal division, slippage, or nuclear  
728 fragmentation) were documented. p-values are given for mitotic duration and were calculated  
729 by one-way ANOVA followed by Tukey's multiple comparisons test. \*\*\*\* : p < 0.0001. ns : p =  
730 0.1. Error bars = mean ± SD.

731

732 **Figure 2:** *DNA replication machinery is not limiting in enlarged G<sub>1</sub> cells.*

733 (A) Coulter Counter-based cell volume measurements for samples (triplicate) used for TMT-  
734 based MS experiment.

735 (B) (*left*) Comparison of relative protein abundances in enlarged cells vs. either Torin1 (y-axis)  
736 or contact inhibited (x-axis) cells plotted as log<sub>2</sub>(fold change). E2F targets are labeled in pur-  
737 ple, and histones are labeled in orange. (*right*) Inset showing upregulated proteins in palbo-  
738 ciclib-treated cells relative to both size-constrained conditions with a log<sub>2</sub>(fold change) ≥ 1.  
739 Proteins encoded by E2F target genes are labeled with their gene names.

740 (C) Gene ontology (GO) enrichment of biological processes in the subset of proteins shown  
741 in the inset of (B).

742 (D) Gene ontology (GO) enrichment for transcription factor targets in the subset of proteins  
743 shown in the inset of (B).

744 (E) Protein abundances of origin recognition complex (ORC), PCNA, and minichromosome  
745 maintenance complex (MCM) components as measured by mass spectrometry. All measure-  
746 ments are normalized to the mean of the Day 2 time point. Error bars: mean ± SD.

747 (F) Western blots of whole cell lysate (*top*) and chromatin fractions (*bottom*) from enlarged  
748 and size-constrained cells following an extended G<sub>1</sub> arrest (0 h) and 8 h after release using  
749 antibodies against the indicated proteins. Ponceau staining was used as a loading control for  
750 whole cell lysates. H3 is shown to confirm subsampling of histones in whole cell lysate and as a  
751 loading control for the chromatin fractions.

752

753 **Figure 3:** *Excess G<sub>1</sub> cell size activates p53-dependent signaling in RPE1 cells*

754 (A) Western blot showing p21 levels in size constrained (Torin1 and contact inhibited) and  
755 enlarged G<sub>1</sub> RPE1 cells. GAPDH and Ponceau staining were used as loading controls.

756 (B) Schematic for performing p53 knockdown experiments in enlarged and size-constrained  
757 cells.

758 (C) Western blot depicting p21 levels in cycling, size-constrained, and enlarged cells with and  
759 without p53 knockdown. Note that p53 was not detected by western blot in cycling or G<sub>1</sub> ar-  
760 rested RPE1 cells. Coomassie staining of the gel was used as a loading control.

761 (D) Cumulative frequency curves for cells were calculated based on the number of cells at a  
762 given time point that surpassed an arbitrary mAG1-geminin<sup>1-110</sup> intensity threshold following  
763 palbociclib washout. At least 90 cells were analyzed for each condition at each time point.  
764 (E) The timing from G<sub>1</sub> release (start of imaging) until mitotic entry for the first 40 cells that  
765 reach mitosis for each condition in the experiment described in (D-F). p-values were calculated  
766 by one-way ANOVA followed by Tukey's multiple comparisons test. \*\*\*\* : p < 0.0001; ns : p =  
767 0.9992.  
768 (F-G) Enlarged and size-constrained RPE1 cells expressing the FUCCI cell cycle markers  
769 (mCherry-Cdt1<sup>30-120</sup> and mAG1-geminin<sup>1-110</sup>) were transfected with control or p53-directed siR-  
770 NAs as indicated in (B) and were imaged for 48 hours after drug washout. (F) Quantification  
771 of mitotic duration and mitotic failure rates in enlarged and size-constrained RPE1 cells that  
772 reached mitosis with and without p53 knockdown. Mitotic duration was quantified as the time  
773 from NEB to flattening or division. At least 25 cells were quantified per condition. p-values are  
774 given for mitotic duration and were calculated by two-way ANOVA followed by Tukey's multiple  
775 comparisons test. \* : p = 0.03; ns : p ≥ 0.05. Error bars = mean ± SD. (G) Quantification of  
776 mitotic slippage and nuclear fragmentation rates indicated in (F) as a fraction of total cells that  
777 entered mitosis for each condition. (H) Representative images of cells 48 hours following G<sub>1</sub>  
778 arrest release. Magenta fluorescence indicates mCherry-Cdt1<sup>30-120</sup> fluorescence (G<sub>1</sub> marker),  
779 whereas green indicates mAG1-geminin<sup>1-110</sup> expression (S/G<sub>2</sub>/M marker). Scale bar = 100 μm.  
780 (I) Quantification of (H). S/G<sub>2</sub>/M cells were defined based on FUCCI markers. 3-4 images were  
781 analyzed per condition, and each image contained 80-200 cells. Error bars = mean ± SD.

782

783 **Figure 4:** *Cell cycle entry in enlarged MCF7 cells is blocked by p21*

784 (A) Cell size measurements for cycling MCF7 cells and cells treated with palbociclib and/or  
785 Torin1 for 6 days.

786 (B) Long-term colony formation assay for enlarged and size-constrained MCF7 released from  
787 G<sub>1</sub> arrest. Cells were treated as in (A) with an additional day for recovery from Torin1-treatment  
788 (in the presence of palbociclib) and were then seeded at ~250 cells/cm<sup>2</sup> in the absence of  
789 drugs for 10 days. Cells were then fixed and stained with crystal violet to visualize colonies.

790 (C) Quantification of (B). p-value was calculated by two-tailed, unpaired t-test. n=3. \*\*\* : p =  
791 0.0002. Error bars = mean ± SD.

792 (D) Western blots of whole cell lysates from a release time course following a 6-day G<sub>1</sub> arrest  
793 in size-constrained (Torin1-treated) and enlarged MCF7 cells. After 6 days, cells were washed  
794 into palbociclib-only media for 24 hours before releasing into fresh media as indicated in **Fig-**  
795 **ure 1A**. Cell lysates collected at the indicated time points and probed with the indicated anti-  
796 bodies. GAPDH was used as a loading control.

797 (E) Size-constrained and enlarged MCF7 cells were treated with the indicated siRNA for 24  
798 hours in the continuous presence of palbociclib (as shown in **Figure 3B**) before releasing into  
799 EdU-containing drug-free media for three days. Cells were then collected, and EdU was deri-  
800 vated with AlexaFluor488. EdU incorporation was then measured by flow cytometry. At least  
801 three replicates were analyzed for each condition. ns :  $p \geq 0.05$ , \*\*\*\* :  $p < 0.0001$ . p-values  
802 were calculated by two-way ANOVA followed by Tukey's multiple comparison test. Error bars  
803 = mean  $\pm$  SD.

804 (F) Western blot depicting the results of p53 knockdown on p53 and p21 levels in size-con-  
805 strained (Torin1-treated) and enlarged G<sub>1</sub>-arrested MCF7 cells. Vinculin and Ponceau staining  
806 were used as loading controls.

807 (G) Size-constrained (Torin1-treated) and enlarged MCF7 cells were treated as in (E) using a  
808 p21-directed siRNA for 24 hours in the presence of palbociclib prior to drug washout. Two  
809 days after release, cells were fixed, nuclei were stained with Hoechst 33342, and nuclear  
810 defects were imaged by high-content fluorescence microscopy. The fraction of micronuclei  
811 and binucleated cells observed in each condition were calculated. Four replicates were meas-  
812 ured for each condition, with approximately 300 cells per replicate. For simplicity, cells that  
813 were binucleated and had micronuclei were only categorized as binucleated. Error bars =  
814 mean  $\pm$  SD.

815

816 **Figure 5: Excess cell size dampens DNA damage-induced p53 signaling**

817 (A) RPE1 cells were treated as in **Figure 1A**, but the release step was omitted. After switching  
818 to recovery media (palbociclib alone) for one day, cells were treated with 1  $\mu$ M doxorubicin in  
819 the continuous presence of palbociclib. Cells were collected at the indicated time points, and  
820 the indicated protein abundances were measured by western blot. GAPDH and Ponceau  
821 staining were used as loading controls.

822 (B) Quantification of p53 levels shown in (A). Protein levels were normalized to GAPDH inten-  
823 sity and then the 30 hour size-constrained time point. Error bars = mean  $\pm$  range for two ex-  
824 periments.

825 (C) Enlarged and size-constrained RPE1 cells were treated with 500 nM doxorubicin in the  
826 presence of palbociclib for 16 hours before washing the doxorubicin out (maintaining the pal-  
827 bociclib) and taking samples for western blotting at the indicated time points. Protein abun-  
828 dances were measured by western blot using the indicated antibodies. GAPDH and Ponceau  
829 staining were used as loading controls.

830 (D) Quantification of p53 levels from the experiment shown in (C). Protein levels were normal-  
831 ized to GAPDH intensity and then the 0 hr size-constrained time point. Error bars = mean  $\pm$   
832 range for two experiments.



833 (E) Enlarged and size-constrained RPE1 cells were treated with 5  $\mu\text{M}$  nutlin-3a in the presence  
834 of palbociclib for 24 hours. Cells were collected, and the indicated protein abundances were  
835 measured by western blot. GAPDH and Ponceau staining were used as loading controls.

836

837 **Figure 6: Enlarged  $G_1$  cells are prone to DNA damage**

838 (A) RPE1 cells were treated as in **Figure 1A** and were re-seeded at  $\sim 250$  cells/cm<sup>2</sup> in DMSO-  
839 containing media or 3.125 nM doxorubicin. Cells were then fixed and stained with crystal violet  
840 to visualize colonies after 10 days.

841 (B) Quantification of (A).  $n = 4$ . p-values were calculated by two-way ANOVA followed by  
842 Tukey's multiple comparison test. Samples were normalized to the DMSO treatment condition  
843 for each cell size condition. \*\* :  $p = 0.002$  ; \*\*\*\* :  $p < 0.0001$ . Error bars = mean  $\pm$  SD.

844 (C) RPE1 cells were treated as in **Figure 1A** and were re-seeded at  $\sim 250$  cells/cm<sup>2</sup> in DMSO-  
845 containing media or 0.5 nM camptothecin. Cells were then fixed and stained with crystal violet  
846 to visualize colonies after 10 days.

847 (D) Quantification of (C).  $n = 4$ . p-values were calculated by two-way ANOVA followed by  
848 Tukey's multiple comparison test. Samples were normalized to the DMSO treatment condition  
849 for each cell size condition ns :  $p = 0.2$ ; \*\*\*\* :  $p < 0.0001$ . Error bars = mean  $\pm$  SD.

850 (E) Representative immunofluorescence images of  $\gamma\text{H2AX}$  foci in size-constrained (palbociclib  
851 + Torin1) and enlarged (palbociclib)  $G_1$  RPE1 cells treated with DMSO or 1  $\mu\text{M}$  doxorubicin  
852 for 24 hours. Hoechst 33342 was used as a nuclear counterstain. Scale bar = 70  $\mu\text{m}$ .

853 (F) Quantification of the doxorubicin conditions in the experiment shown in (E). Foci for at least  
854 20 cells were counted for each condition. p-value was calculated by an unpaired two-tailed t-  
855 test. \*\*\*\* :  $p < 0.0001$ . Error bars = mean  $\pm$  SD.

856 (G) DMSO-treated enlarged and size-constrained cells (+/- p53 knockdown) were fixed and  
857 subjected to  $\gamma\text{H2AX}$  immunofluorescence.  $\gamma\text{H2AX}$  foci were counted and binned as indicated.  
858 At least 30 cells were analyzed for each condition.

859 (H) Enlarged and size-constrained cells (+/- p53 knockdown) were treated with 1  $\mu\text{M}$  doxoru-  
860 bicin for 24 hours in the continuous presence of palbociclib were immunostained for  $\gamma\text{H2AX}$ .  
861 Foci were counted for each condition (20 cells each). p-values were calculated by two-way  
862 ANOVA followed by Tukey's multiple comparisons test. \* :  $p = 0.01$  ; \*\*\*\* :  $p < 0.0001$ .

863 (I-J) (I) Representative images of enlarged and size-constrained RPE1 cells that were treated  
864 as in (E-F), fixed, and subjected to  $\gamma\text{H2AX}$  and 53BP1 immunofluorescence. (J) Quantification  
865 of the experiment described in (I). 53BP1 foci were counted and binned as indicated. At least  
866 30 cells were analyzed for each condition.

867 (K) Quantification of  $\gamma\text{H2AX}$  staining in enlarged (palbociclib) and size-constrained (palbo-  
868 ciclib+Torin1)  $G_1$  arrested RPE1 cells that were treated with 1  $\mu\text{M}$  doxorubicin for 16 hours  
869 (time = 0) and 4 hours after doxorubicin washout (remaining in palbociclib). Hoechst 33342

870 was used as a nuclear counter stain. At least 30 cells were analyzed for each condition. p-  
871 values were calculated by two-way ANOVA followed by Tukey's multiple comparisons test. \*\*\*  
872 : p = 0.0002; \*\*\*\* : p < 0.0001 ; ns : p = 0.5.

873  
874

## 875 References

876  
877 1. Campisi, J. and F. d'Adda di Fagagna, *Cellular senescence: when bad things happen*  
878 *to good cells*. Nat Rev Mol Cell Biol, 2007. **8**(9): p. 729-40.

879 2. Collado, M., M.A. Blasco, and M. Serrano, *Cellular senescence in cancer and aging*.  
880 Cell, 2007. **130**(2): p. 223-233.

881 3. Wang, L., L. Lankhorst, and R. Bernards, *Exploiting senescence for the treatment of*  
882 *cancer*. Nat Rev Cancer, 2022. **22**(6): p. 340-355.

883 4. Yang, L.X., J. Fang, and J.D. Chen, *Tumor cell senescence response produces*  
884 *aggressive variants*. Cell Death Discovery, 2017. **3**(1): p. 17049.

885 5. Hayflick, L. and P.S. Moorhead, *The serial cultivation of human diploid cell strains*.  
886 Experimental Cell Research, 1961. **25**(3): p. 585-621.

887 6. Ginzberg, M.B., R. Kafri, and M. Kirschner, *Cell biology. On being the right (cell) size*.  
888 Science, 2015. **348**(6236): p. 1245075.

889 7. Neurohr, G.E., et al., *Excessive Cell Growth Causes Cytoplasm Dilution And*  
890 *Contributes to Senescence*. Cell, 2019. **176**(5): p. 1083-1097 e18.

891 8. Demidenko, Z.N. and M.V. Blagosklonny, *Growth stimulation leads to cellular*  
892 *senescence when the cell cycle is blocked*. Cell Cycle, 2008. **7**(21): p. 3355-3361.

893 9. Lengefeld, J., et al., *Cell size is a determinant of stem cell potential during aging*. Sci  
894 Adv, 2021. **7**(46): p. eabk0271.

895 10. Wilson, G.A., et al., *Active growth signalling promotes cancer cell sensitivity to the*  
896 *CDK7 inhibitor ICEC0942*. bioRxiv, 2021: p. 2021.09.10.459733.

897 11. Crozier, L., et al., *CDK4/6 inhibitors induce replication stress to cause long-term cell*  
898 *cycle withdrawal*. EMBO J, 2022. **41**(6): p. e108599.

899 12. Lanz, M.C., et al., *Increasing cell size remodels the proteome and promotes*  
900 *senescence*. Molecular Cell, 2022: p. 2021.07.29.454227.

901 13. Engeland, K., *Cell cycle regulation: p53-p21-RB signaling*. Cell Death Differ, 2022.  
902 **29**(5): p. 946-960.

- 903 14. Zhang, H.S., A.A. Postigo, and D.C. Dean, *Active Transcriptional Repression by the*  
904 *Rb–E2F Complex Mediates G1 Arrest Triggered by p16INK4a, TGFβ, and Contact*  
905 *Inhibition*. Cell, 1999. **97**(1): p. 53-61.
- 906 15. Malumbres, M. and M. Barbacid, *Cell cycle, CDKs and cancer: a changing paradigm*.  
907 Nature Reviews Cancer, 2009. **9**(3): p. 153-166.
- 908 16. Qin, X.Q., et al., *The transcription factor E2F-1 is a downstream target of RB action*.  
909 Mol Cell Biol, 1995. **15**(2): p. 742-55.
- 910 17. Malumbres, M. and M. Barbacid, *To cycle or not to cycle: a critical decision in cancer*.  
911 Nat Rev Cancer, 2001. **1**(3): p. 222-31.
- 912 18. Witkiewicz, A.K., et al., *Targeting the Vulnerability of RB Tumor Suppressor Loss in*  
913 *Triple-Negative Breast Cancer*. Cell Rep, 2018. **22**(5): p. 1185-1199.
- 914 19. Zatulovskiy, E., et al., *Cell growth dilutes the cell cycle inhibitor Rb to trigger cell*  
915 *division*. Science, 2020. **369**(6502): p. 466-471.
- 916 20. Zhang, S., et al., *The cell cycle inhibitor RB is diluted in G1 and contributes to*  
917 *controlling cell size in the mouse liver*. bioRxiv, 2022: p. 2022.06.08.495371.
- 918 21. Kasthuber, E.R. and S.W. Lowe, *Putting p53 in Context*. Cell, 2017. **170**(6): p.  
919 1062-1078.
- 920 22. Hinchcliffe, E.H., et al., *Chromosome missegregation during anaphase triggers p53*  
921 *cell cycle arrest through histone H3.3 Ser31 phosphorylation*. Nat Cell Biol, 2016.  
922 **18**(6): p. 668-75.
- 923 23. Lopez-Garcia, C., et al., *BCL9L Dysfunction Impairs Caspase-2 Expression*  
924 *Permitting Aneuploidy Tolerance in Colorectal Cancer*. Cancer Cell, 2017. **31**(1): p.  
925 79-93.
- 926 24. Thompson, S.L., S.F. Bakhoun, and D.A. Compton, *Mechanisms of chromosomal*  
927 *instability*. Curr Biol, 2010. **20**(6): p. R285-95.
- 928 25. Liu, D. and Y. Xu, *p53, Oxidative Stress, and Aging*. Antioxidants & Redox Signaling,  
929 2011. **15**(6): p. 1669-1678.
- 930 26. Meek, D.W., *Tumour suppression by p53: a role for the DNA damage response?* Nat  
931 Rev Cancer, 2009. **9**(10): p. 714-23.
- 932 27. Sherr, C.J. and F. McCormick, *The RB and p53 pathways in cancer*. Cancer Cell,  
933 2002. **2**(2): p. 103-112.
- 934 28. Fischer, M., *Census and evaluation of p53 target genes*. Oncogene, 2017. **36**(28): p.  
935 3943-3956.

- 936 29. Abbas, T. and A. Dutta, *p21 in cancer: intricate networks and multiple activities*. Nat  
937 Rev Cancer, 2009. **9**(6): p. 400-14.
- 938 30. LaBaer, J., et al., *New functional activities for the p21 family of CDK inhibitors*. Genes  
939 Dev, 1997. **11**(7): p. 847-62.
- 940 31. Hsu, C.H., S.J. Altschuler, and L.F. Wu, *Patterns of Early p21 Dynamics Determine*  
941 *Proliferation-Senescence Cell Fate after Chemotherapy*. Cell, 2019. **178**(2): p. 361-  
942 373 e12.
- 943 32. Waga, S., et al., *The p21 inhibitor of cyclin-dependent kinases controls DNA*  
944 *replication by interaction with PCNA*. Nature, 1994. **369**(6481): p. 574-578.
- 945 33. Hsieh, J.-K., et al., *RB Regulates the Stability and the Apoptotic Function of p53 via*  
946 *MDM2*. Molecular Cell, 1999. **3**(2): p. 181-193.
- 947 34. Leontieva, O.V. and M.V. Blagosklonny, *DNA damaging agents and p53 do not*  
948 *cause senescence in quiescent cells, while consecutive re-activation of mTOR is*  
949 *associated with conversion to senescence*. Aging (Albany NY), 2010. **2**(12): p. 924-  
950 35.
- 951 35. Yang, R., et al., *Functions of cyclin A1 in the cell cycle and its interactions with*  
952 *transcription factor E2F-1 and the Rb family of proteins*. Mol Cell Biol, 1999. **19**(3): p.  
953 2400-7.
- 954 36. Sakaue-Sawano, A., et al., *Visualizing spatiotemporal dynamics of multicellular cell-*  
955 *cycle progression*. Cell, 2008. **132**(3): p. 487-98.
- 956 37. Spies, J., et al., *53BP1 nuclear bodies enforce replication timing at under-replicated*  
957 *DNA to limit heritable DNA damage*. Nature Cell Biology, 2019. **21**(4): p. 487-+.
- 958 38. Claude, K.L., et al., *Transcription coordinates histone amounts and genome content*.  
959 Nat Commun, 2021. **12**(1): p. 4202.
- 960 39. Gemble, S., et al., *Genetic instability from a single S phase after whole-genome*  
961 *duplication*. Nature, 2022. **604**(7904): p. 146-151.
- 962 40. Ibarra, A., E. Schwob, and J. Mendez, *Excess MCM proteins protect human cells*  
963 *from replicative stress by licensing backup origins of replication*. Proc Natl Acad Sci  
964 U S A, 2008. **105**(26): p. 8956-61.
- 965 41. Vernell, R., K. Helin, and H. Muller, *Identification of target genes of the p16INK4A-*  
966 *pRB-E2F pathway*. J Biol Chem, 2003. **278**(46): p. 46124-37.
- 967 42. El-Deiry, W., *WAF1, a potential mediator of p53 tumor suppression*. Cell, 1993.  
968 **75**(4): p. 817-825.
- 969 43. El-Deiry, W.S., et al., *WAF1/CIP1 Is Induced in p53-mediated G1 Arrest and*  
970 *Apoptosis1*. Cancer Research, 1994. **54**(5): p. 1169-1174.

- 971 44. Crozier, L., et al., *Cell overgrowth during G1 arrest triggers an osmotic stress*  
972 *response and chronic p38MAPK activation to promote permanent cell cycle arrest.*  
973 bioRxiv, 2022.
- 974 45. Blackford, A.N. and S.P. Jackson, *ATM, ATR, and DNA-PK: The Trinity at the Heart*  
975 *of the DNA Damage Response.* Mol Cell, 2017. **66**(6): p. 801-817.
- 976 46. Georgakilas, A.G., O.A. Martin, and W.M. Bonner, *p21: A Two-Faced Genome*  
977 *Guardian.* Trends Mol Med, 2017. **23**(4): p. 310-319.
- 978 47. Wang, B., et al., *Pharmacological CDK4/6 inhibition reveals a p53-dependent*  
979 *senescent state with restricted toxicity.* EMBO J, 2022. **41**(6): p. e108946.
- 980 48. Benedict, B., et al., *Loss of p53 suppresses replication-stress-induced DNA breakage*  
981 *in G1/S checkpoint deficient cells.* Elife, 2018. **7**: p. e37868.
- 982 49. Vijayaraghavan, S., et al., *CDK4/6 and autophagy inhibitors synergistically induce*  
983 *senescence in Rb positive cytoplasmic cyclin E negative cancers.* Nature  
984 communications, 2017. **8**: p. 15916-15916.
- 985 50. Foy, R., et al., *Oncogenic signals prime cancer cells for toxic cell growth during a G1*  
986 *cell cycle arrest.* bioRxiv, 2022.
- 987 51. McKinley, K.L. and I.M. Cheeseman, *Large-Scale Analysis of CRISPR/Cas9 Cell-*  
988 *Cycle Knockouts Reveals the Diversity of p53-Dependent Responses to Cell-Cycle*  
989 *Defects.* Dev Cell, 2017. **40**(4): p. 405-420 e2.
- 990 52. Marusyk, A., et al., *p53 mediates senescence-like arrest induced by chronic*  
991 *replicational stress.* Molecular and Cellular Biology, 2007. **27**(15): p. 5336-5351.
- 992 53. Taylor, W.R., et al., *p53 inhibits entry into mitosis when DNA synthesis is blocked.*  
993 Oncogene, 1999. **18**(2): p. 283-95.
- 994 54. Vassilev, L.T., et al., *In vivo activation of the p53 pathway by small-molecule*  
995 *antagonists of MDM2.* Science, 2004. **303**(5659): p. 844-8.
- 996 55. Shiloh, Y., *The ATM-mediated DNA-damage response: taking shape.* Trends  
997 Biochem Sci, 2006. **31**(7): p. 402-10.
- 998 56. Wang, B., et al., *53BP1, a mediator of the DNA damage checkpoint.* Science, 2002.  
999 **298**(5597): p. 1435-1438.
- 1000 57. Panier, S. and S.J. Boulton, *Double-strand break repair: 53BP1 comes into focus.*  
1001 Nat Rev Mol Cell Biol, 2014. **15**(1): p. 7-18.
- 1002 58. Barr, A.R., et al., *DNA damage during S-phase mediates the proliferation-quiescence*  
1003 *decision in the subsequent G1 via p21 expression.* Nat Commun, 2017. **8**: p. 14728.

- 1004 59. Leontieva, O.V., Z.N. Demidenko, and M.V. Blagosklonny, *Contact inhibition and*  
1005 *high cell density deactivate the mammalian target of rapamycin pathway, thus*  
1006 *suppressing the senescence program*. Proc Natl Acad Sci U S A, 2014. **111**(24): p.  
1007 8832-7.
- 1008 60. Michaloglou, C., et al., *Combined Inhibition of mTOR and CDK4/6 Is Required for*  
1009 *Optimal Blockade of E2F Function and Long-term Growth Inhibition in Estrogen*  
1010 *Receptor-positive Breast Cancer*. Mol Cancer Ther, 2018. **17**(5): p. 908-920.
- 1011 61. Zatulovskiy, E., et al., *Delineation of proteome changes driven by cell size and*  
1012 *growth rate*. Frontiers in Cell and Developmental Biology, 2022.
- 1013 62. Yang, J., et al., *Cell size and growth rate are major determinants of replicative*  
1014 *lifespan*. Cell Cycle, 2011. **10**(1): p. 144-55.
- 1015 63. Anglada, T., A. Genesca, and M. Martin, *Age-associated deficient recruitment of*  
1016 *53BP1 in G1 cells directs DNA double-strand break repair to BRCA1/CtIP-mediated*  
1017 *DNA-end resection*. Aging (Albany NY), 2020. **12**(24): p. 24872-24893.
- 1018 64. Kilic, S., et al., *Phase separation of 53BP1 determines liquid-like behavior of DNA*  
1019 *repair compartments*. EMBO J, 2019. **38**(16): p. e101379.
- 1020 65. Cuella-Martin, R., et al., *53BP1 Integrates DNA Repair and p53-Dependent Cell Fate*  
1021 *Decisions via Distinct Mechanisms*. Molecular Cell, 2016. **64**(1): p. 51-64.
- 1022 66. Ghodke, I., et al., *AHNAK controls 53BP1-mediated p53 response by restraining*  
1023 *53BP1 oligomerization and phase separation*. Mol Cell, 2021. **81**(12): p. 2596-2610  
1024 e7.
- 1025 67. Galli, M. and D.O. Morgan, *Cell Size Determines the Strength of the Spindle*  
1026 *Assembly Checkpoint during Embryonic Development*. Dev Cell, 2016. **36**(3): p. 344-  
1027 52.
- 1028 68. Roca, M., et al., *Acquisition of the Spindle Assembly Checkpoint and its modulation*  
1029 *by cell fate and cell size in a chordate embryo*. bioRxiv, 2022: p. 2022.05.18.492463.
- 1030 69. Zeman, M.K. and K.A. Cimprich, *Causes and consequences of replication stress*. Nat  
1031 Cell Biol, 2014. **16**(1): p. 2-9.
- 1032 70. Mycock, K., et al., *Real-World Palbociclib Use in HR+/HER2- Advanced Breast*  
1033 *Cancer in Canada: The IRIS Study*. Curr Oncol, 2021. **28**(1): p. 678-688.
- 1034 71. Goel, S., et al., *CDK4/6 Inhibition in Cancer: Beyond Cell Cycle Arrest*. Trends Cell  
1035 Biol, 2018. **28**(11): p. 911-925.
- 1036 72. Maskey, R.S., et al., *Sustained mTORC1 activity during palbociclib-induced growth*  
1037 *arrest triggers senescence in ER+ breast cancer cells*. Cell Cycle, 2021. **20**(1): p. 65-  
1038 80.

- 1039 73. Guzman, C., et al., *ColonyArea: an ImageJ plugin to automatically quantify colony*  
1040 *formation in clonogenic assays*. PLoS One, 2014. **9**(3): p. e92444.
- 1041 74. Edelstein, A.D., et al., *Advanced methods of microscope control using  $\mu$ Manager*  
1042 *software*. Journal of Biological Methods, 2014. **1**(2).
- 1043 75. Manohar, S., et al., *The Insulin Receptor Adaptor IRS2 is an APC/C Substrate That*  
1044 *Promotes Cell Cycle Protein Expression and a Robust Spindle Assembly Checkpoint*.  
1045 *Mol Cell Proteomics*, 2020. **19**(9): p. 1450-1467.
- 1046 76. Cox, J. and M. Mann, *MaxQuant enables high peptide identification rates,*  
1047 *individualized p.p.b.-range mass accuracies and proteome-wide protein*  
1048 *quantification*. Nat Biotechnol, 2008. **26**(12): p. 1367-72.
- 1049 77. Benjamini, Y. and Y. Hochberg, *Controlling the False Discovery Rate - a Practical*  
1050 *and Powerful Approach to Multiple Testing*. Journal of the Royal Statistical Society  
1051 *Series B-Statistical Methodology*, 1995. **57**(1): p. 289-300.
- 1052 78. Ge, S.X., D. Jung, and R. Yao, *ShinyGO: a graphical gene-set enrichment tool for*  
1053 *animals and plants*. Bioinformatics, 2020. **36**(8): p. 2628-2629.  
1054

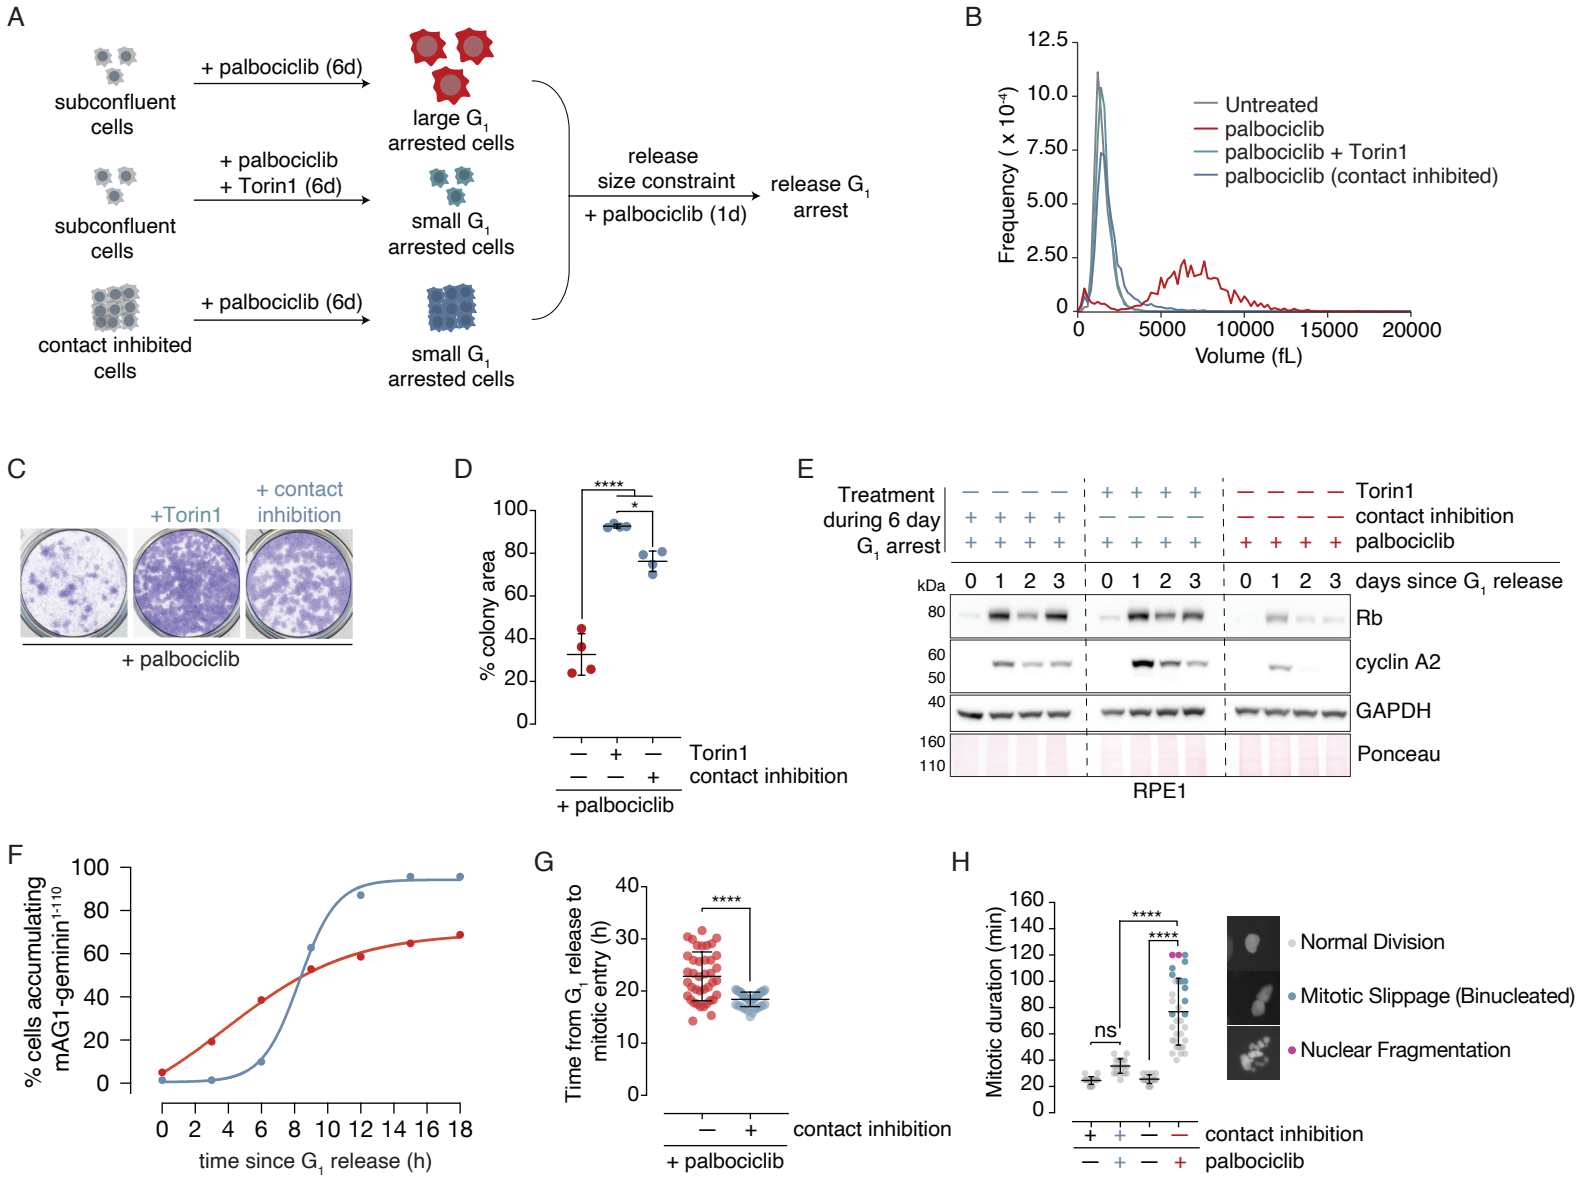



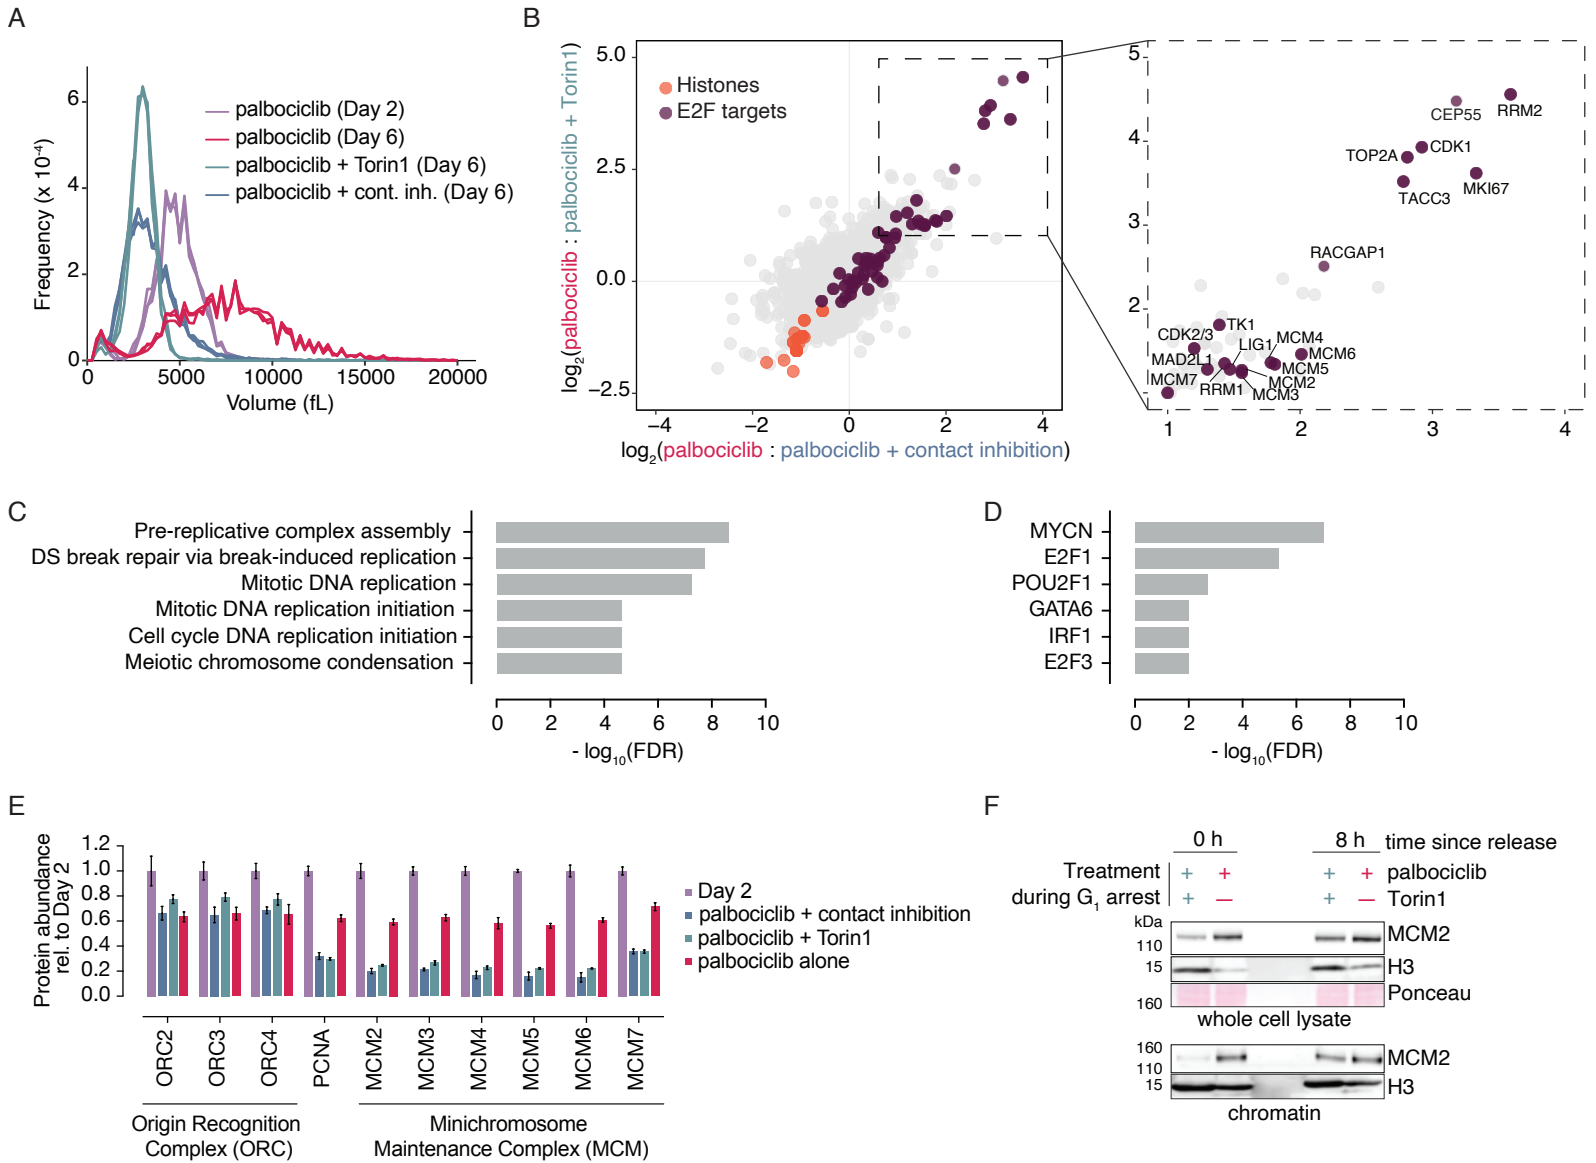

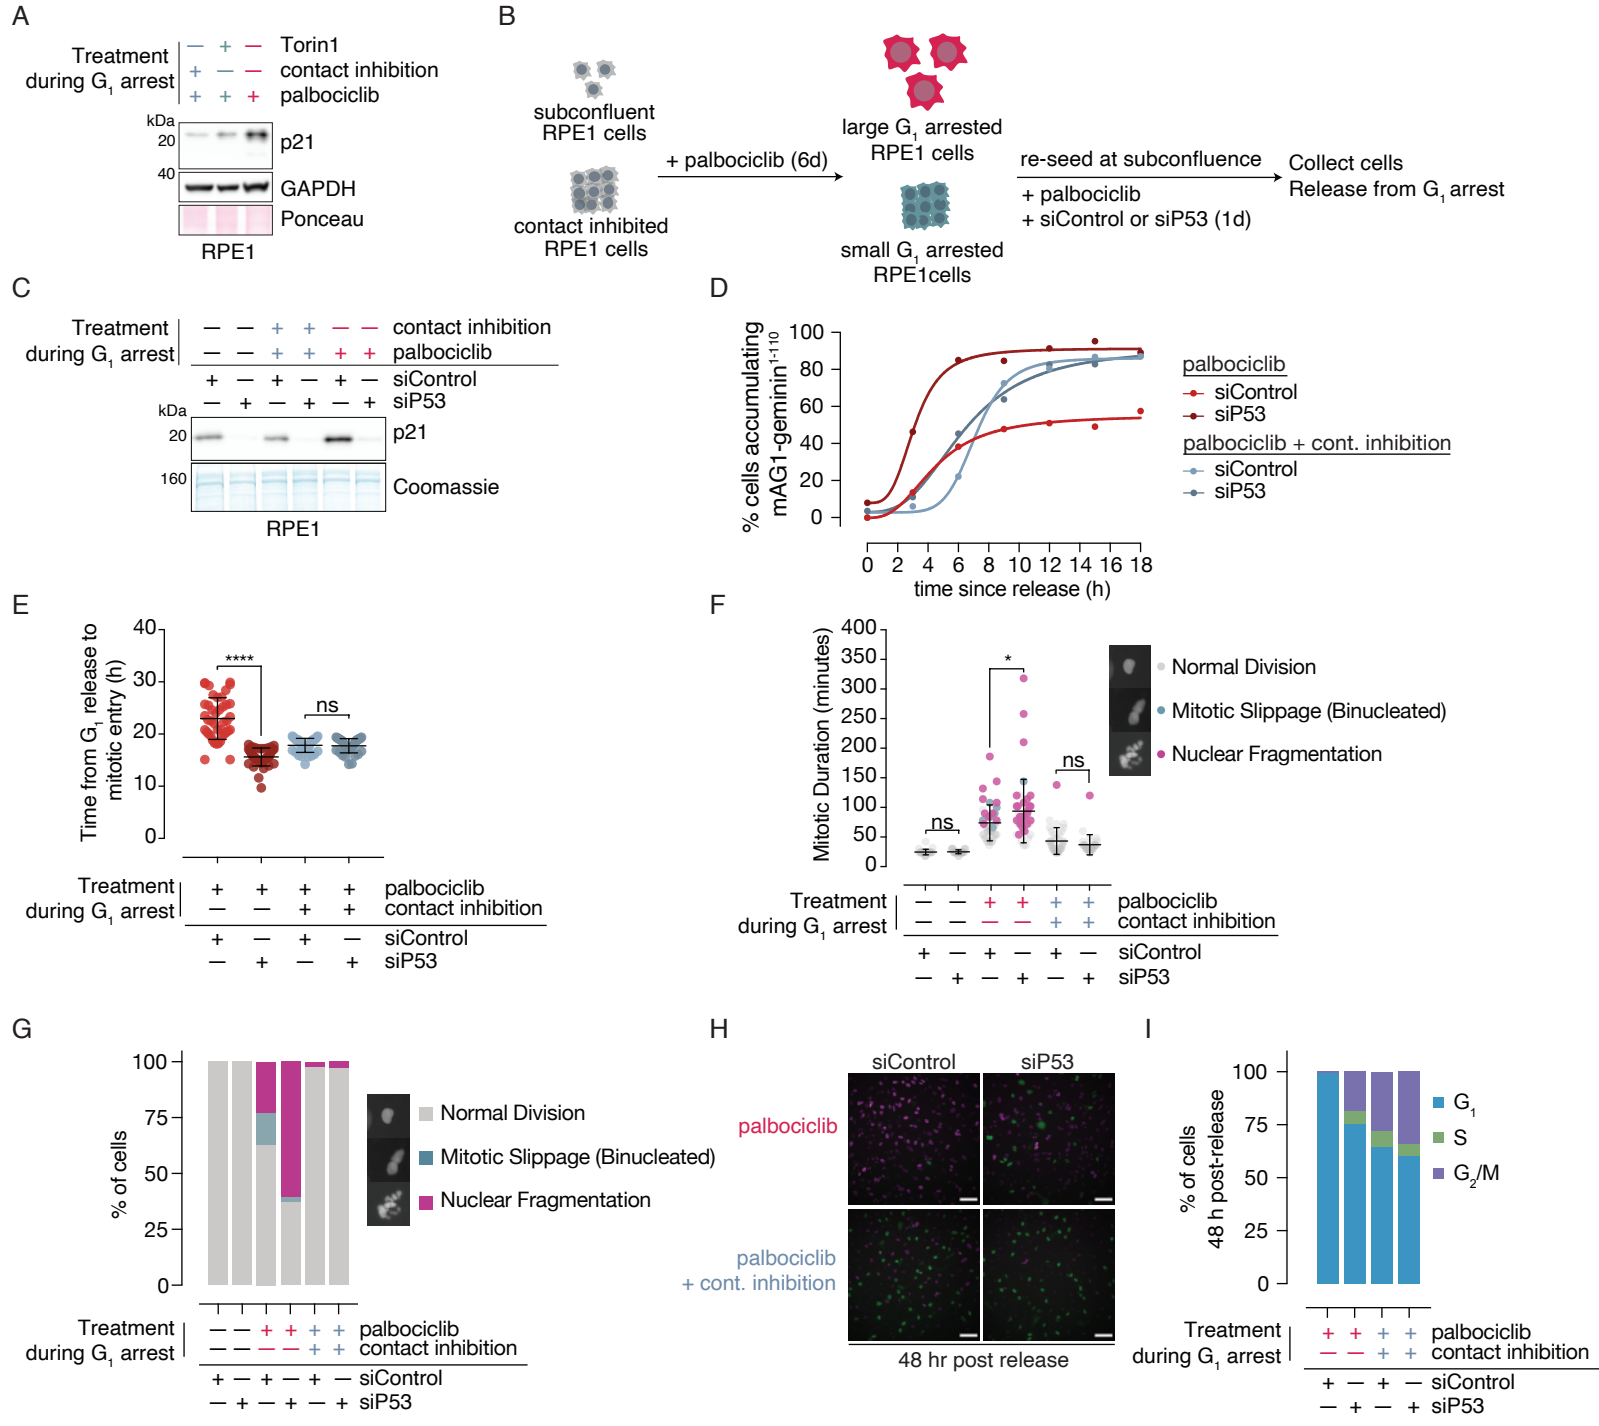

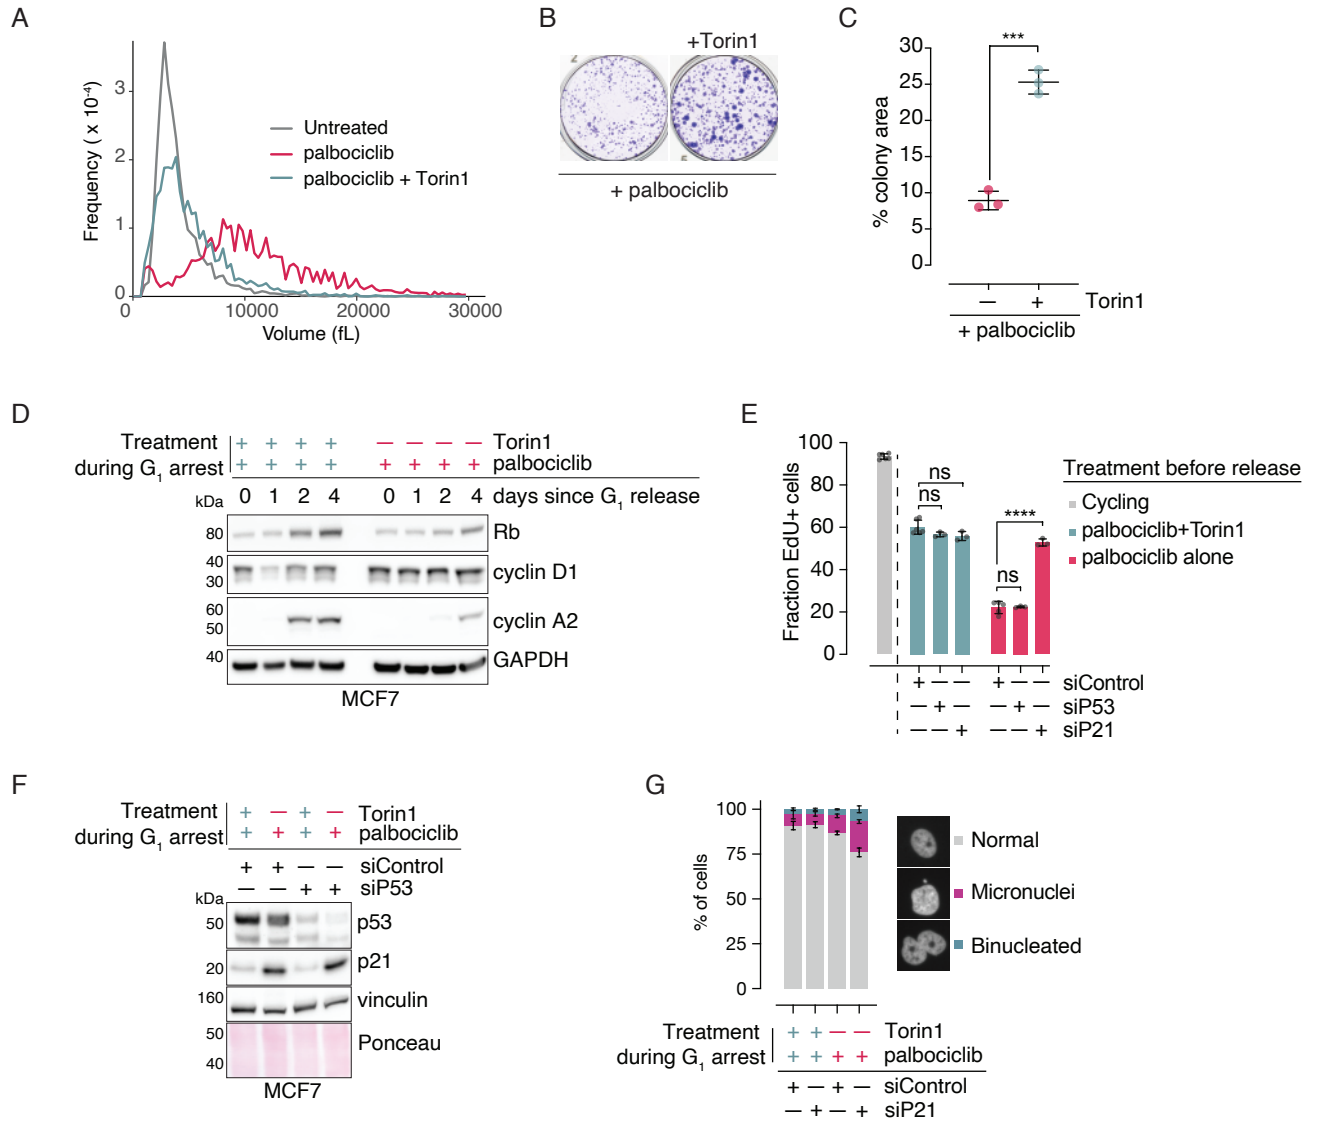

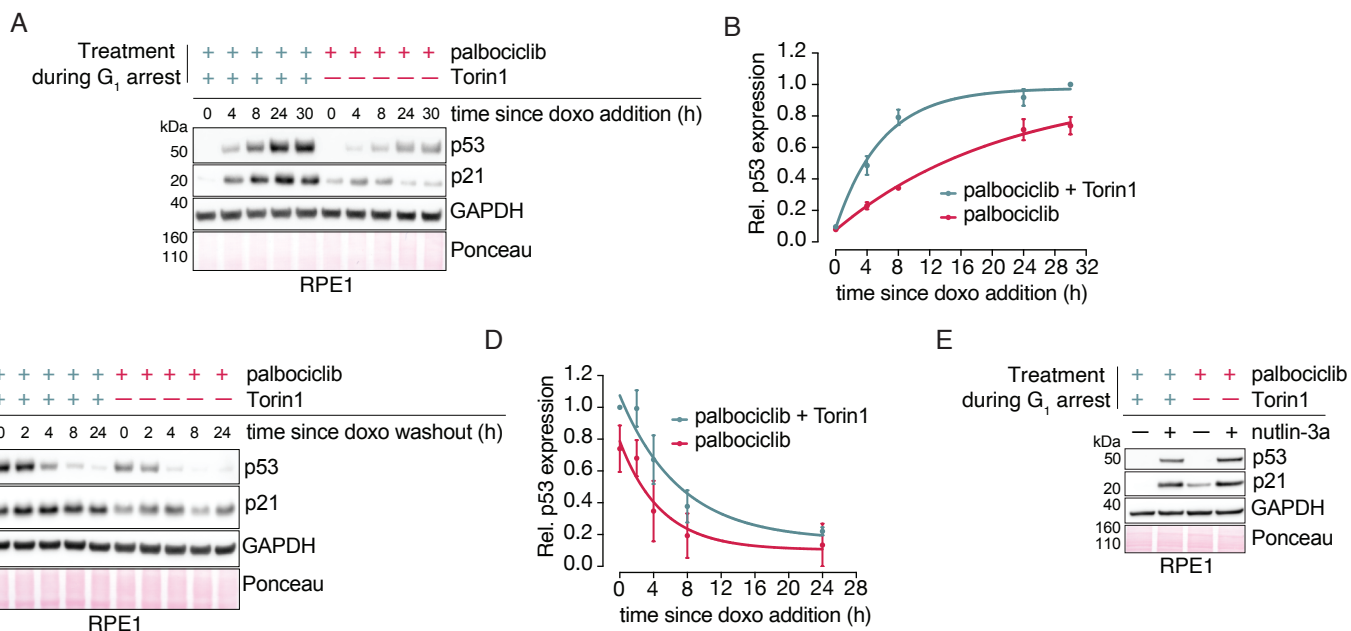

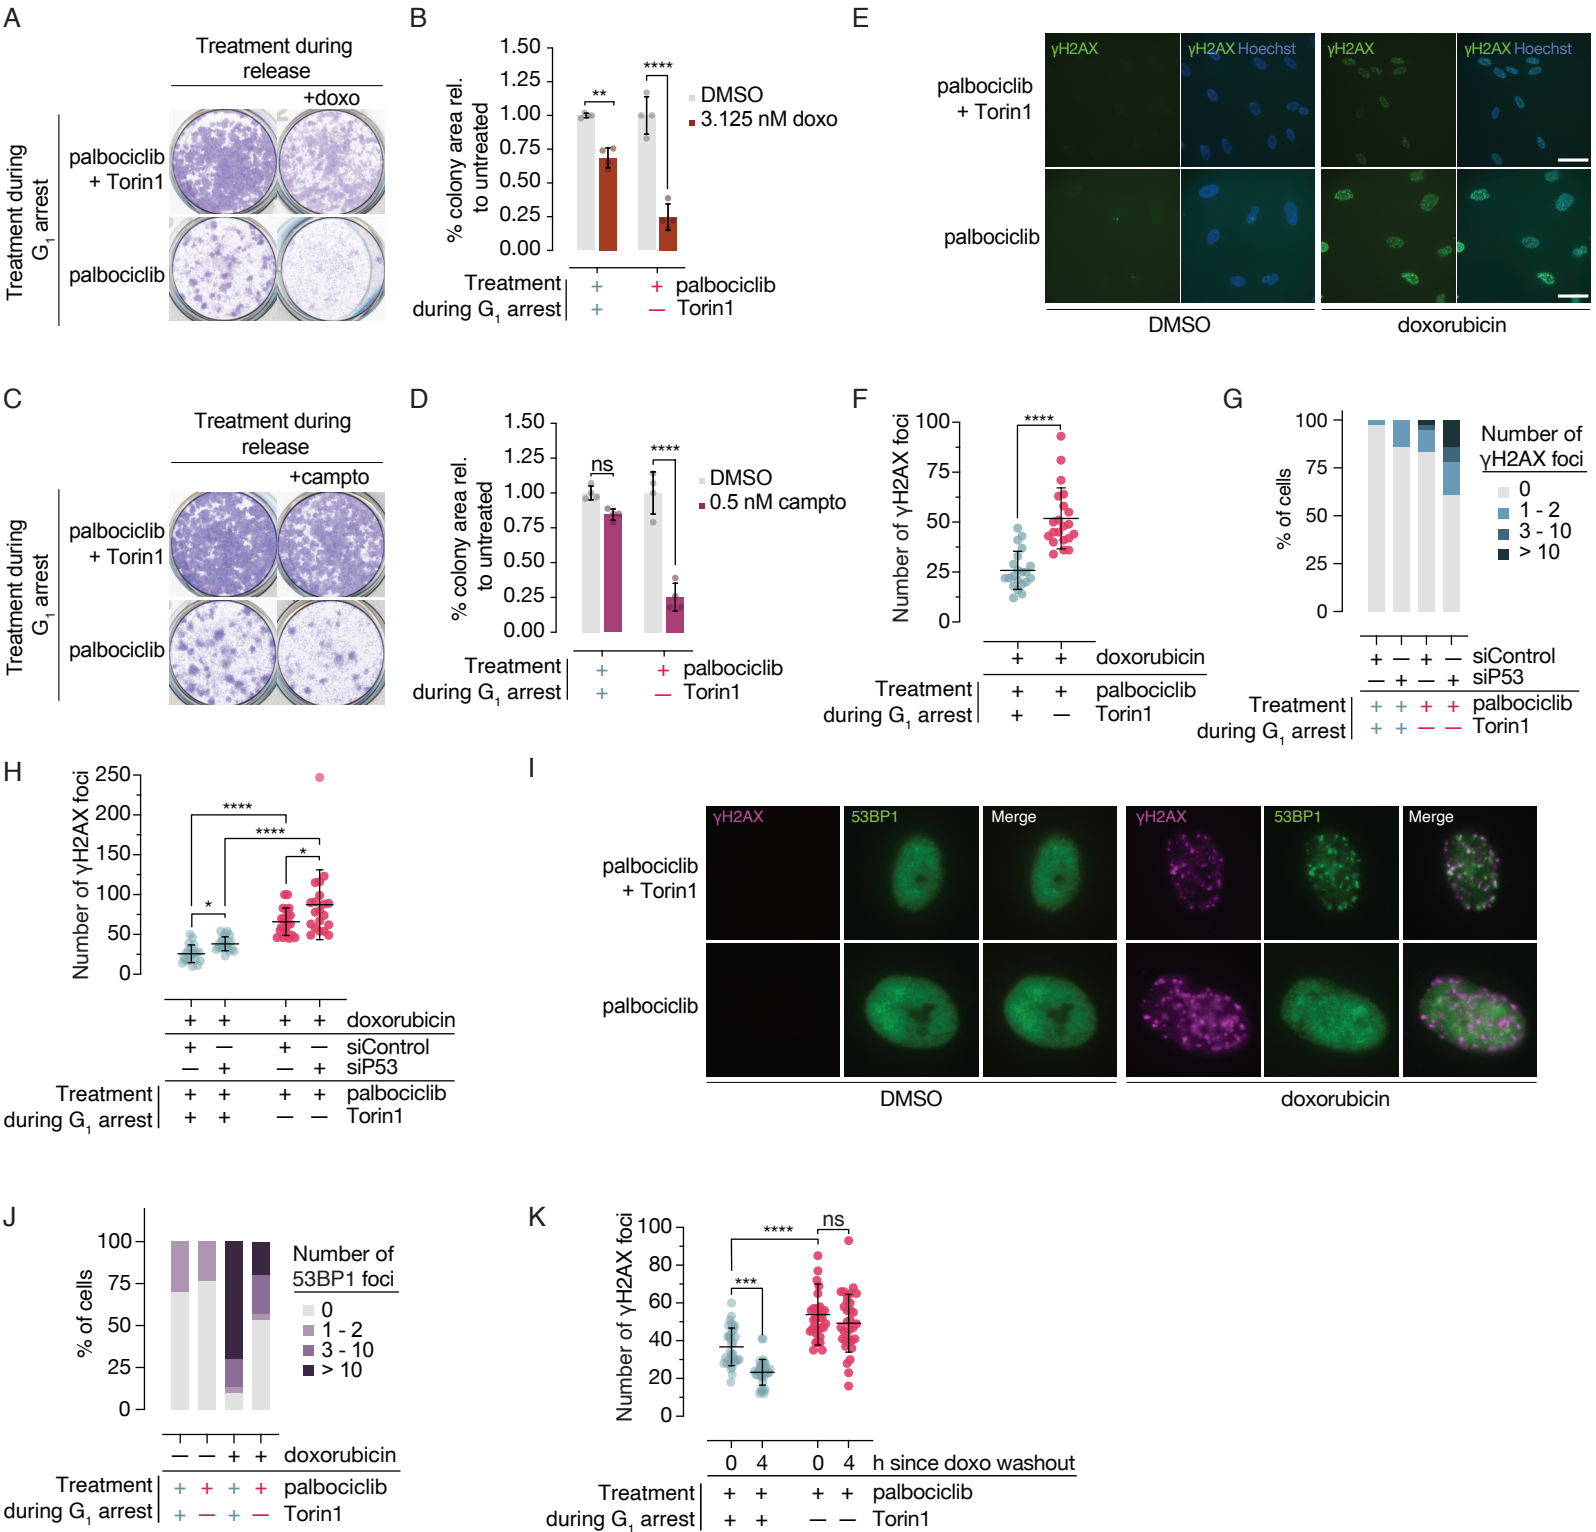

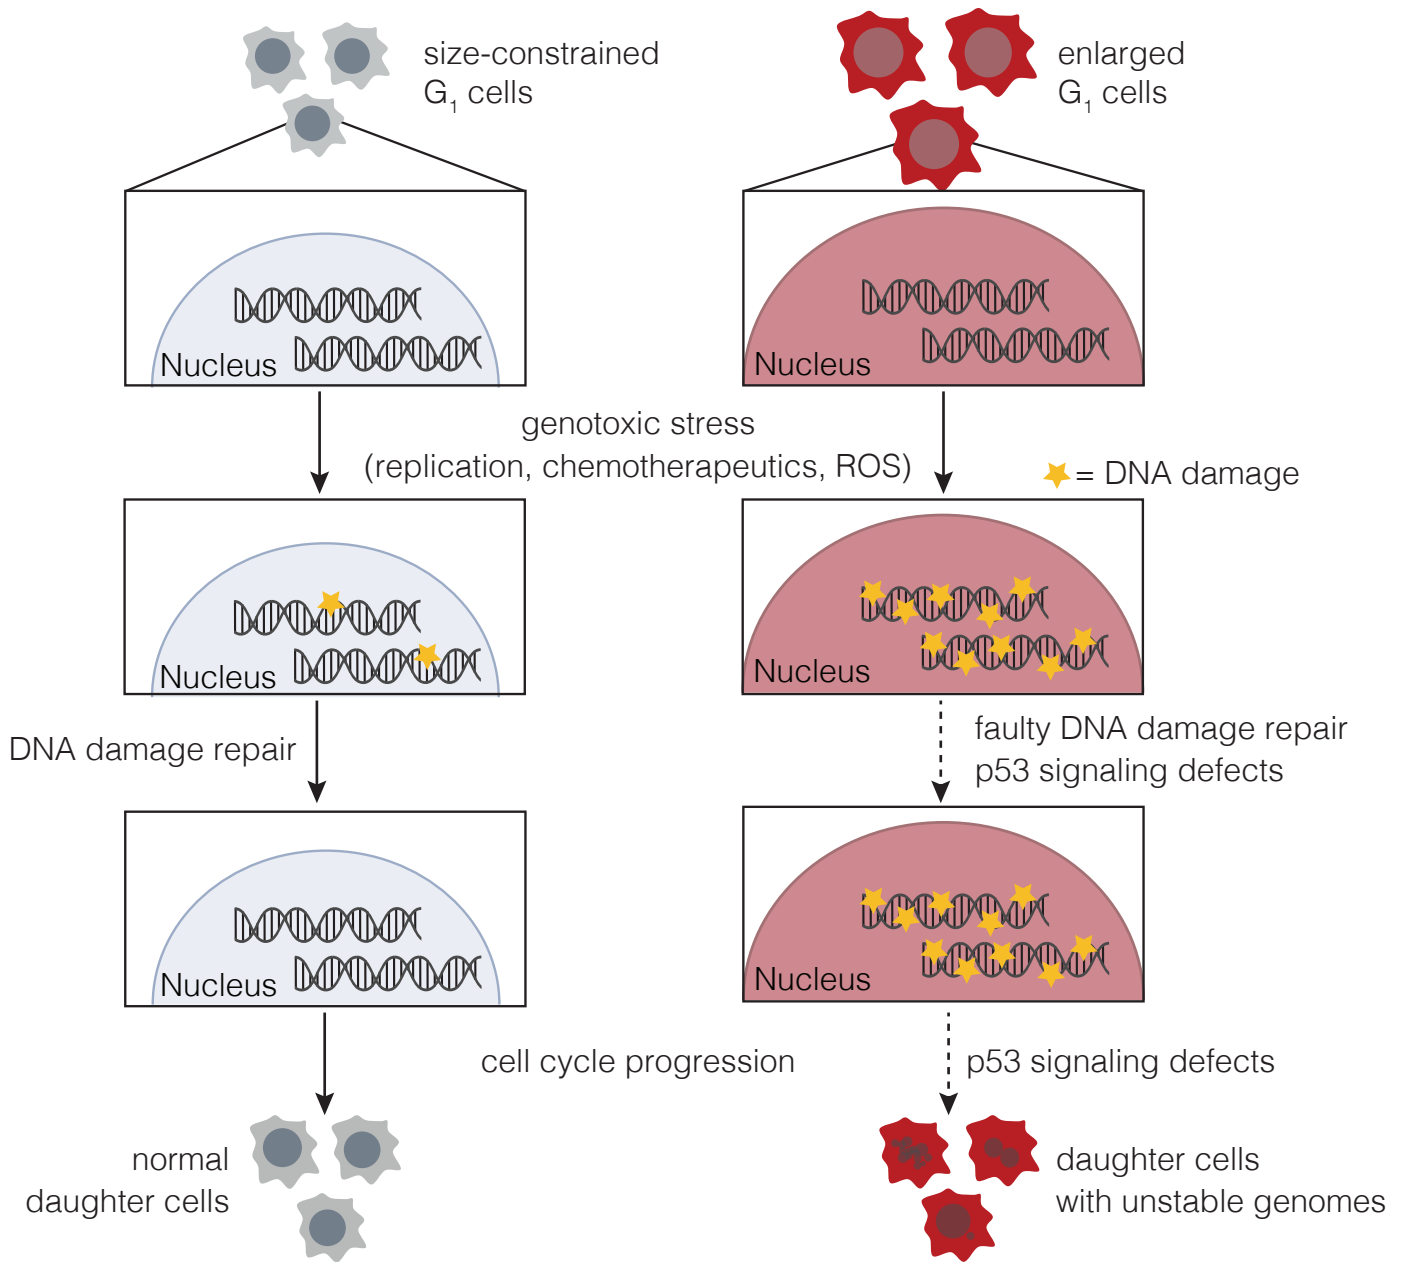

Source: https://www.biorxiv.org/content/10.1101/2022.09.08.506740v1.full.pdf
